# Supplementary material for: Macrophage-rich niches regulate T cell dynamics at the liver invasive margin during gallbladder cancer progression
Source: JCI journal article supplement (doi:10.1172/jci193672), 2026-03-02

Figure 6G GBC-SD

$\beta$ -Tubulin  
LGALS4

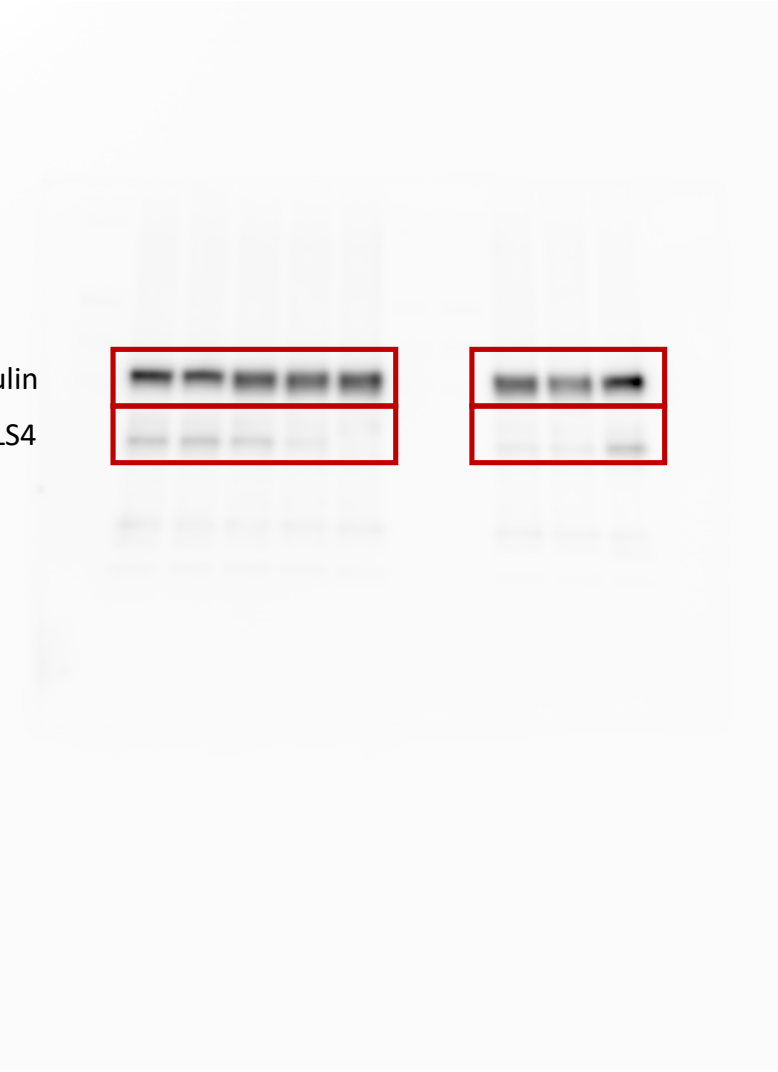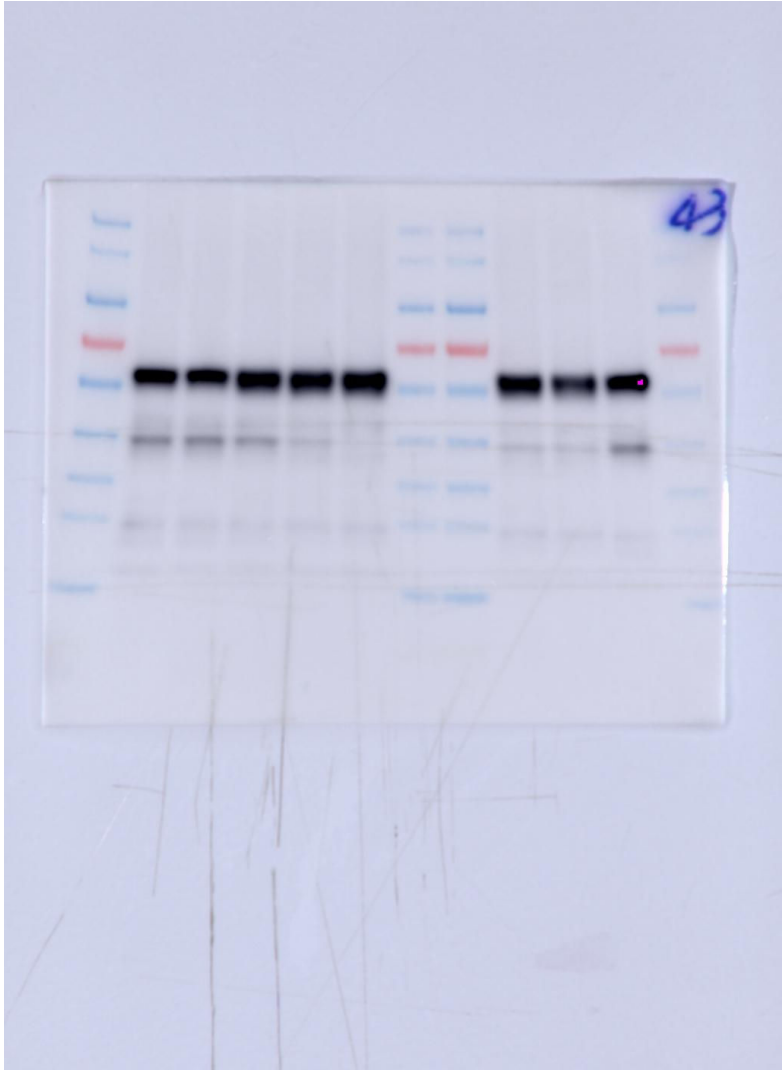

Figure 6G ZJU-0430

$\beta$ -Tubulin  
LGALS4

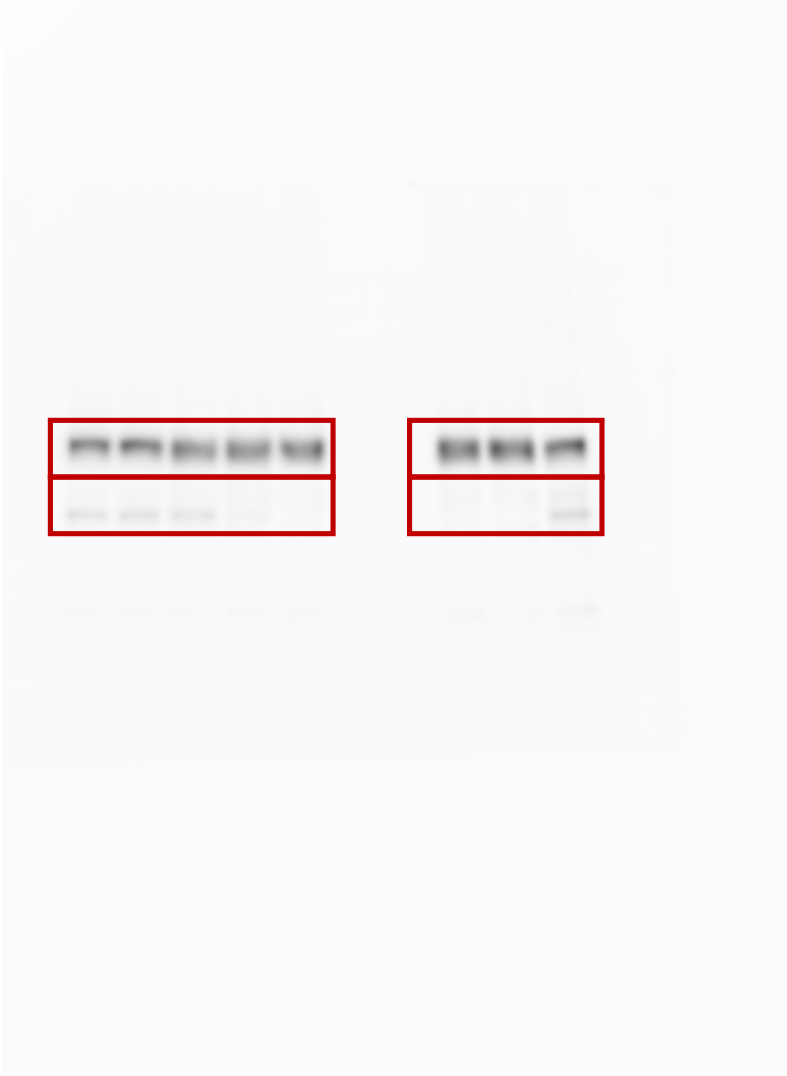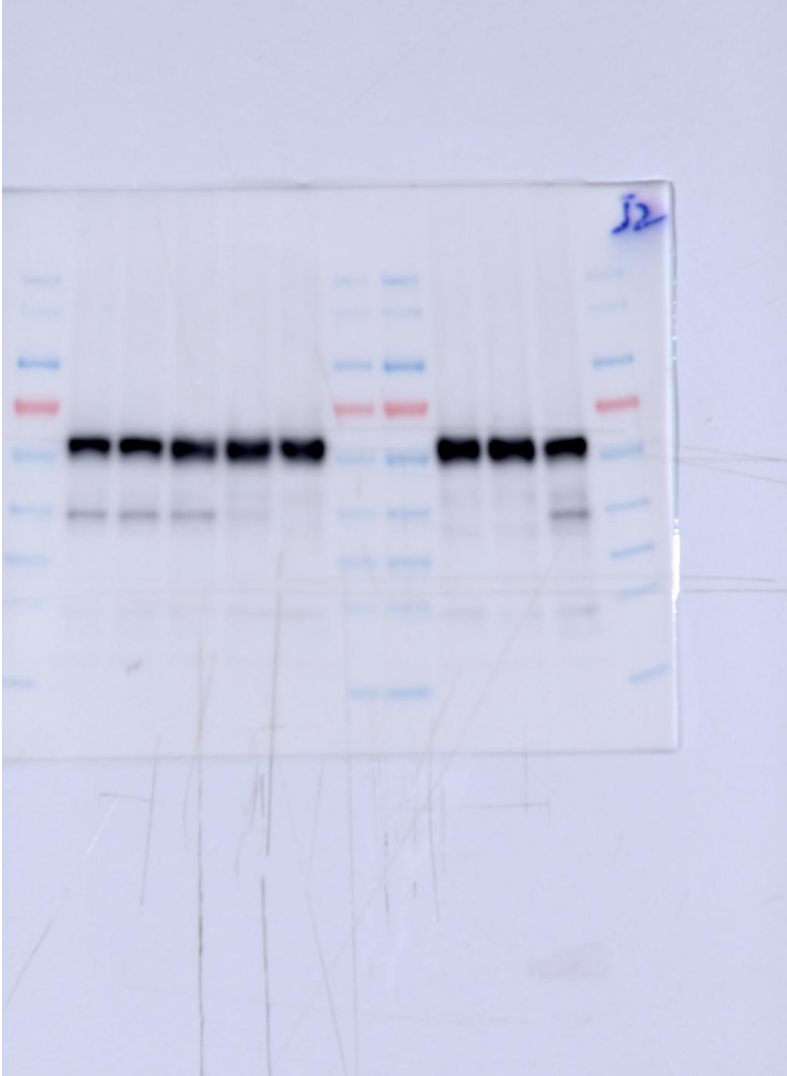

Figure S12D T cells co-cultured with GBC/SD

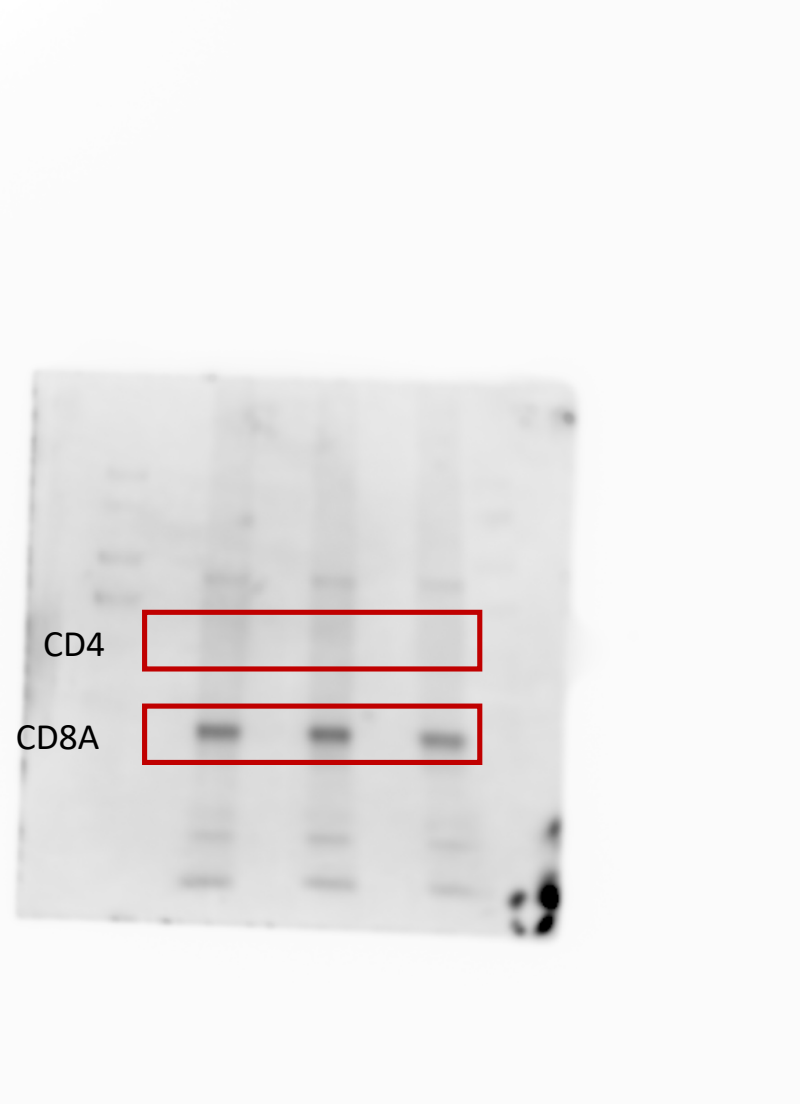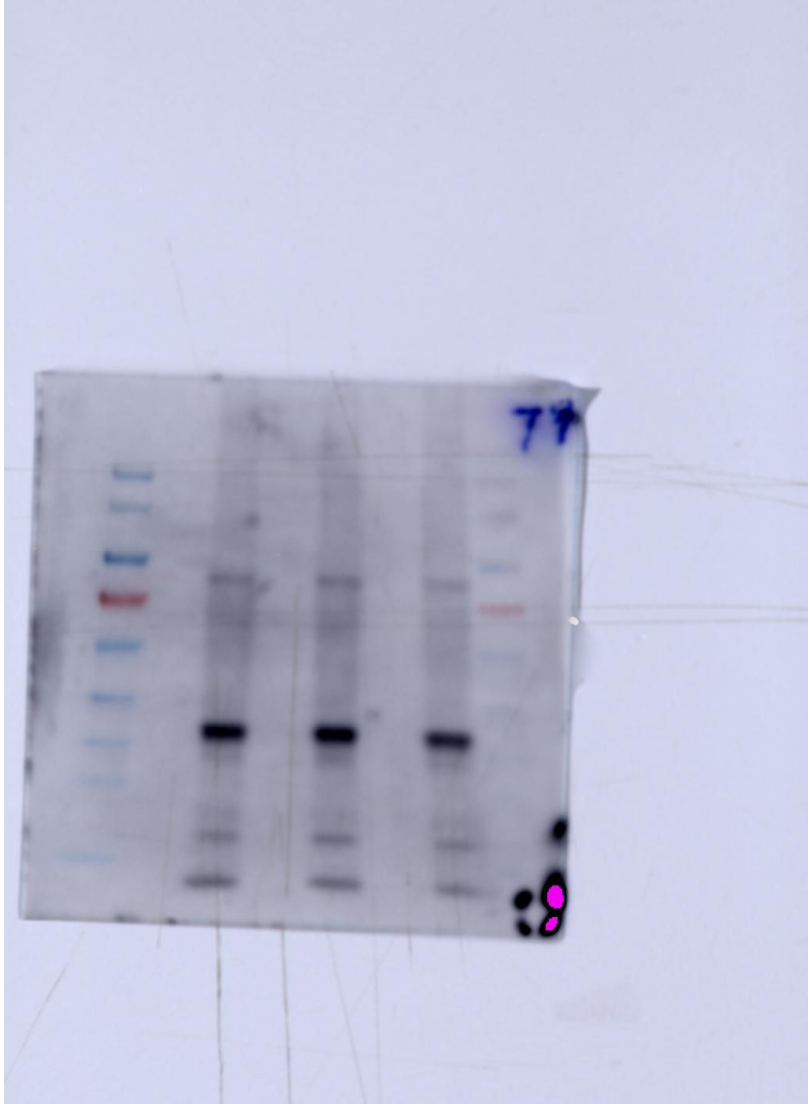

Figure S12D T cells co-cultured with GBC/SD

CXCL13

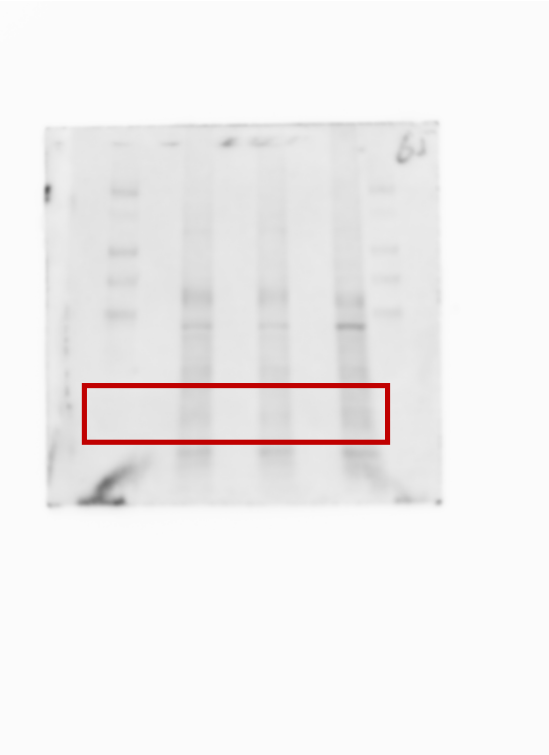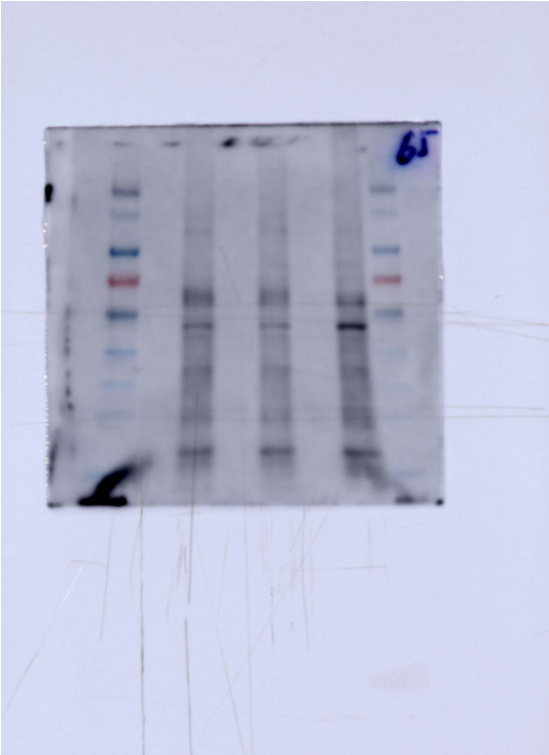

$\beta$ -Tubulin

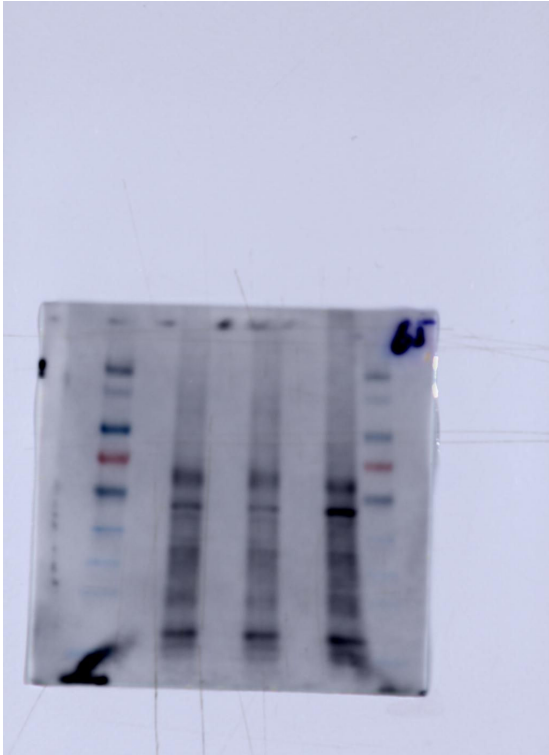

Figure S12D T cells co-cultured with GBC/SD

PD-1

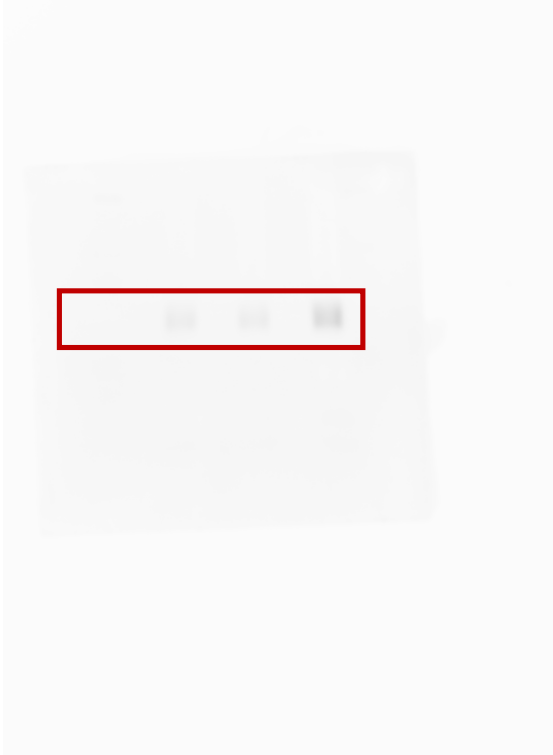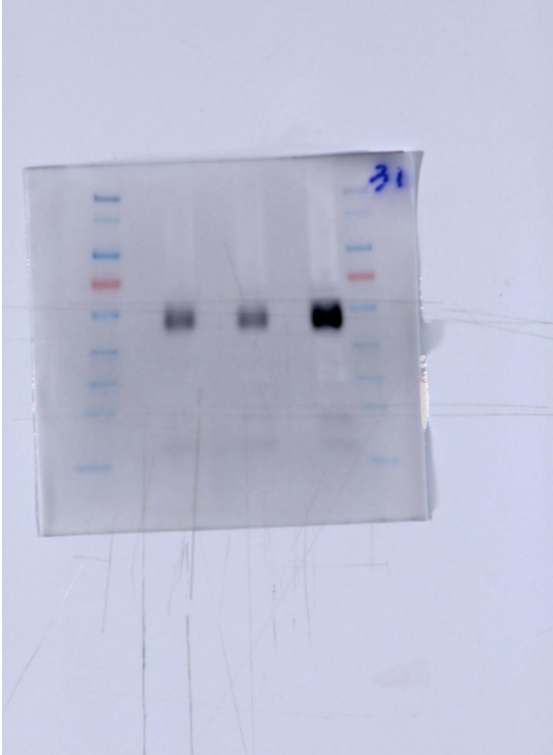

$\beta$ -Tubulin

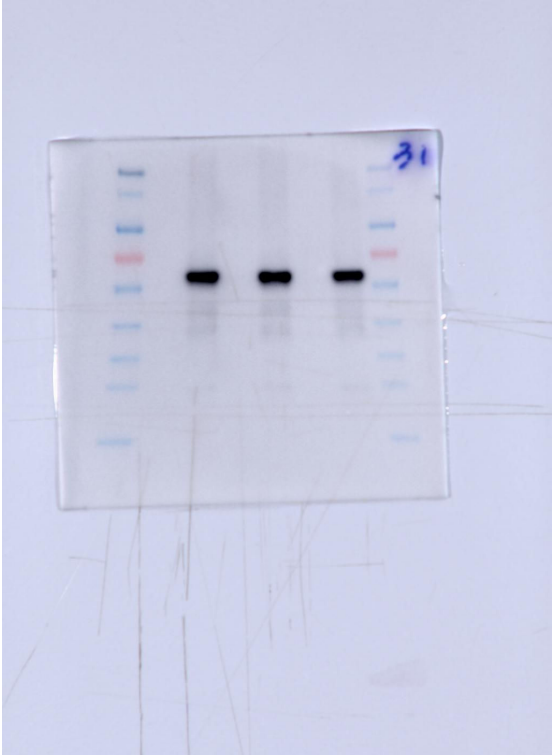

Figure S12D T cells co-cultured with GBC/SD

CTLA-4

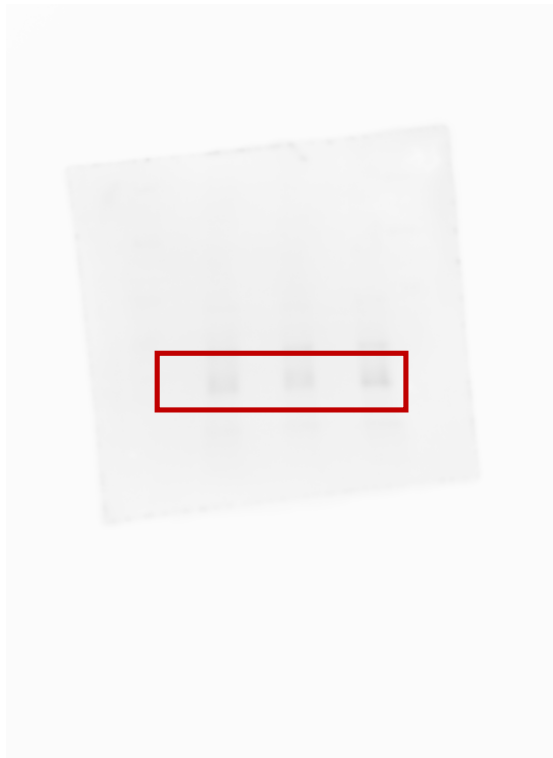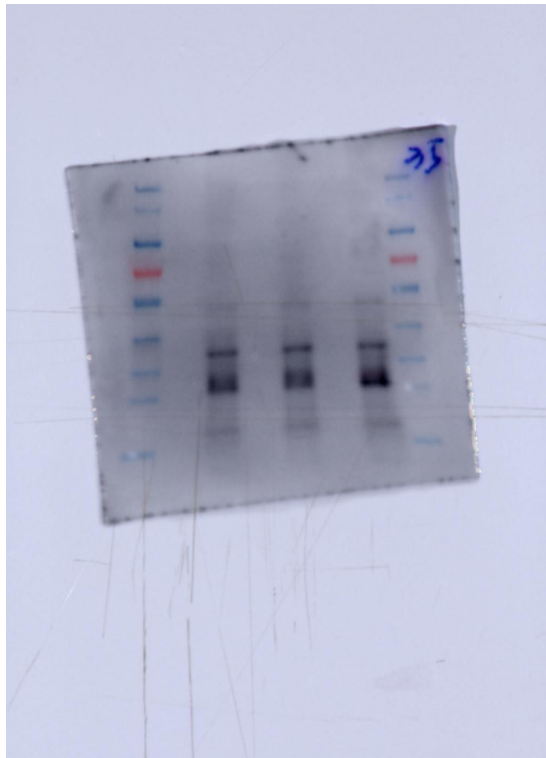

Figure S12D T cells co-cultured with GBC/SD

IFN- $\gamma$

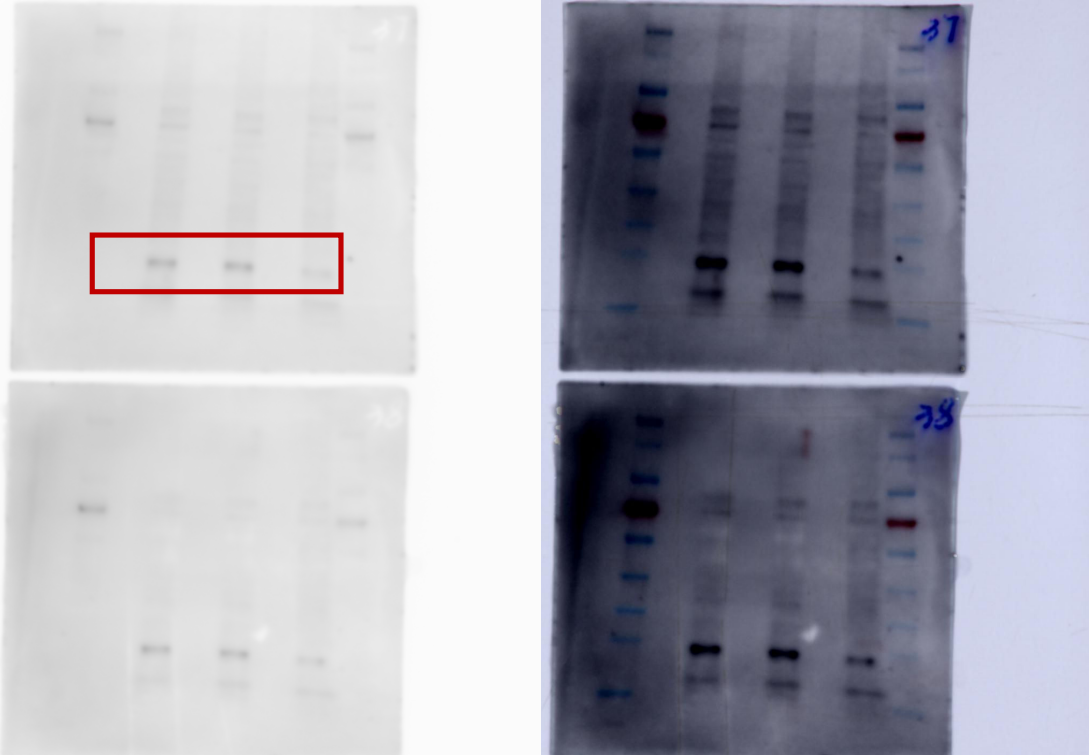

$\beta$ -Tubulin

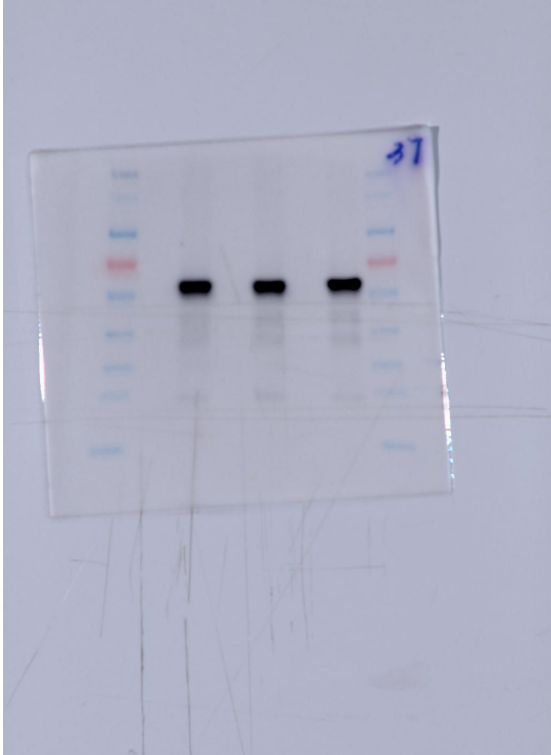

Figure S12D T cells co-cultured with GBC/SD

TNF- $\alpha$

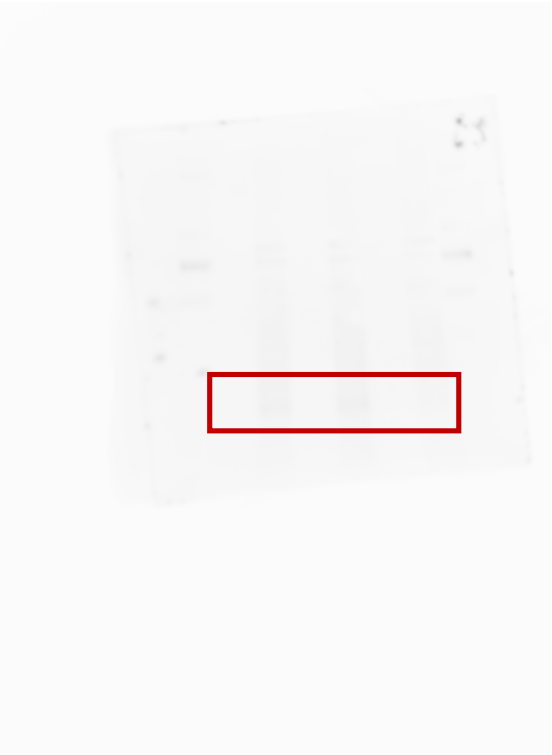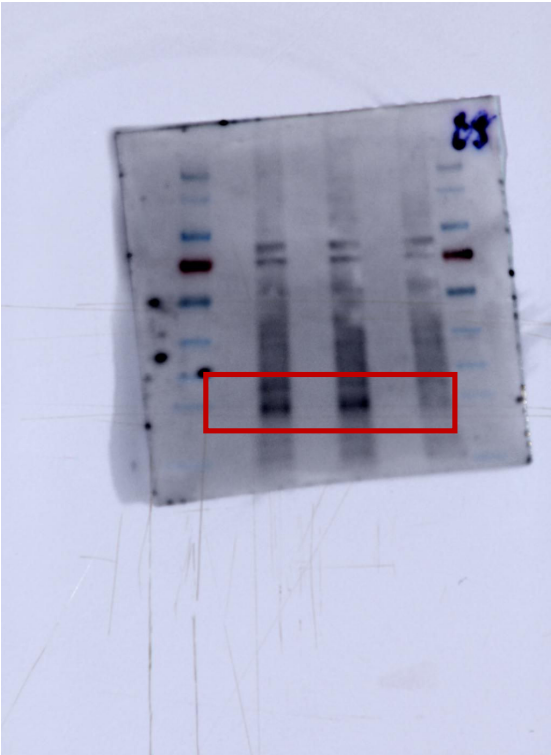

$\beta$ -Tubulin

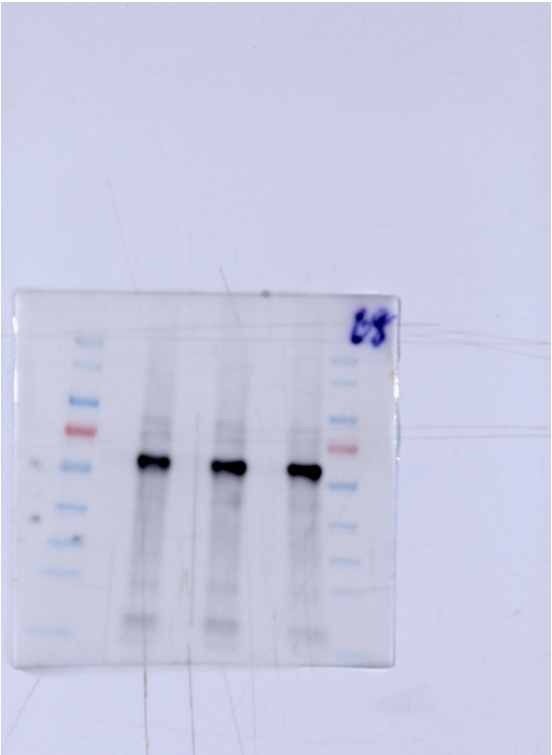

Figure S12D T cells co-cultured with ZJU0430

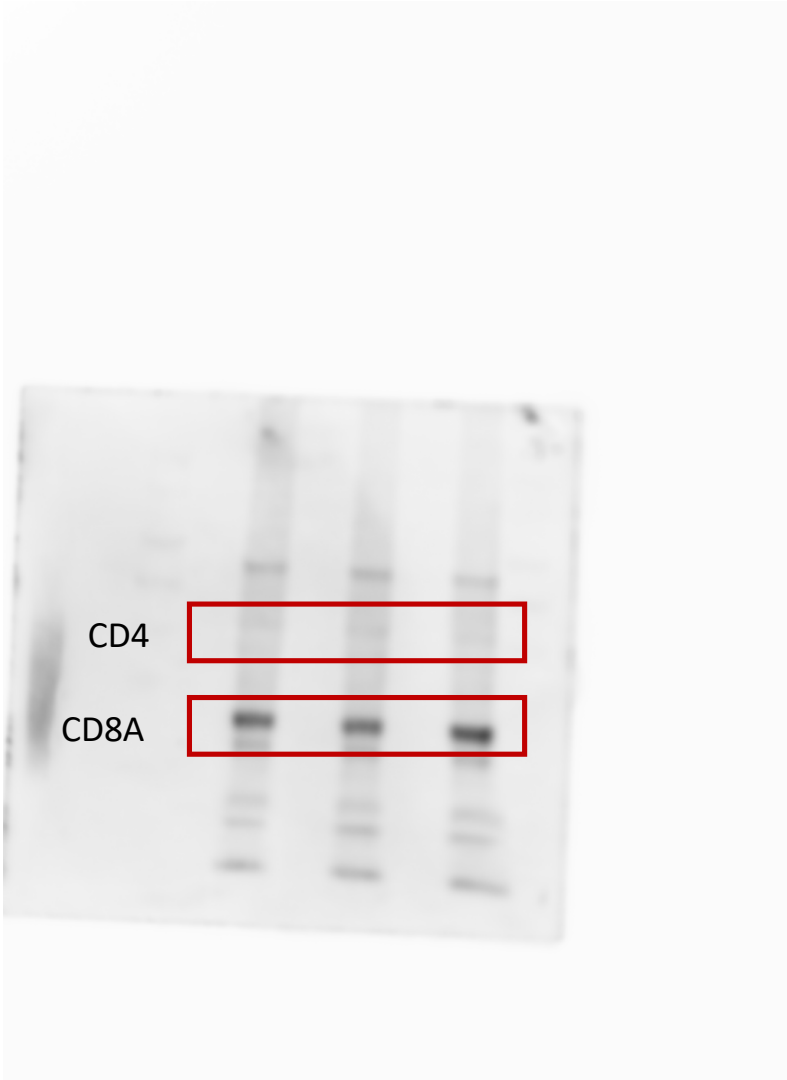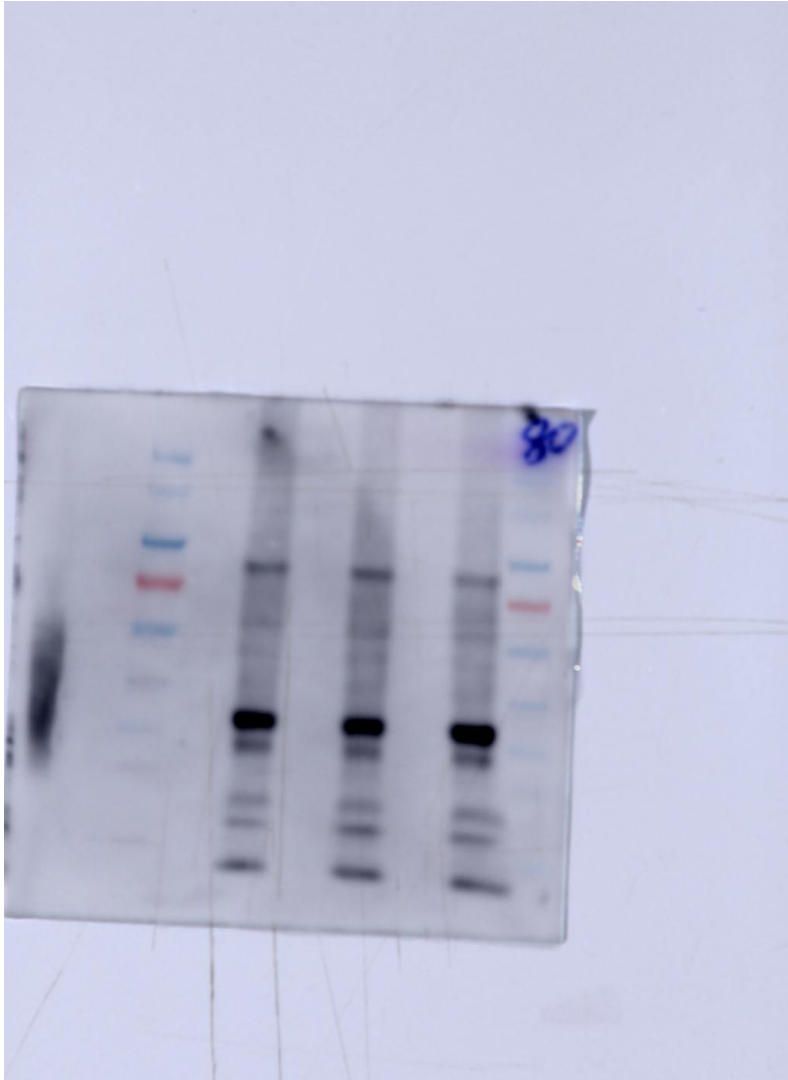

Figure S12D T cells co-cultured with ZJU0430

CXCL13

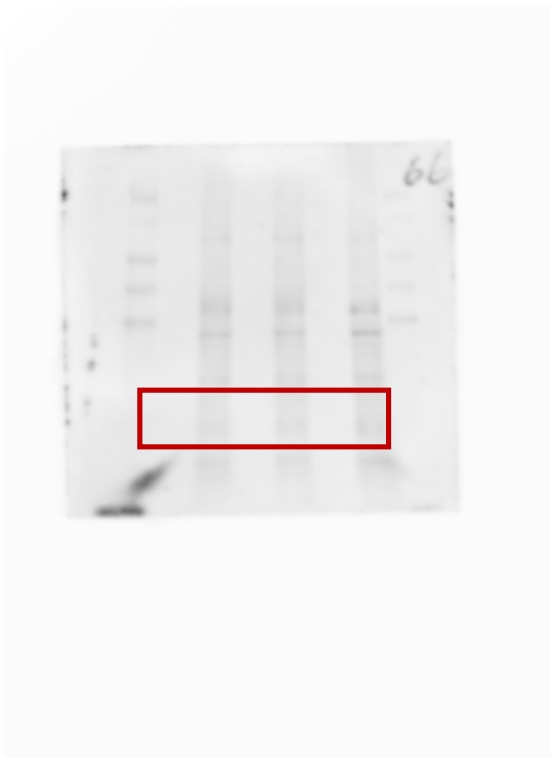

$\beta$ -Tubulin

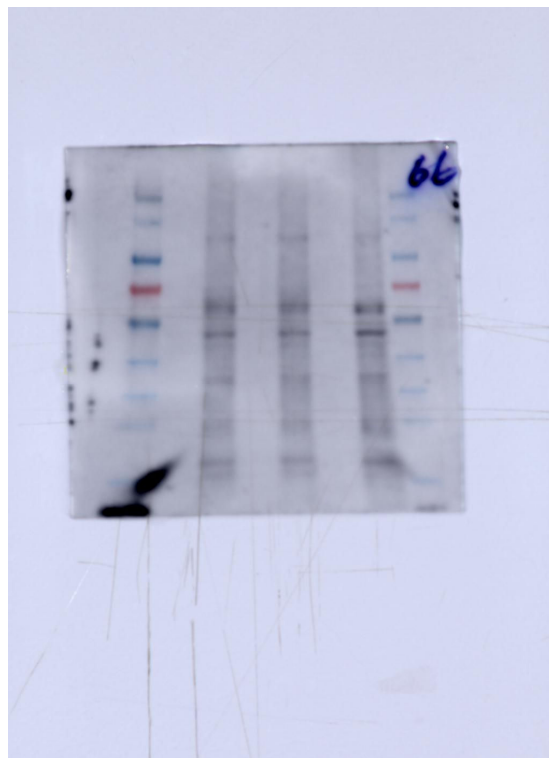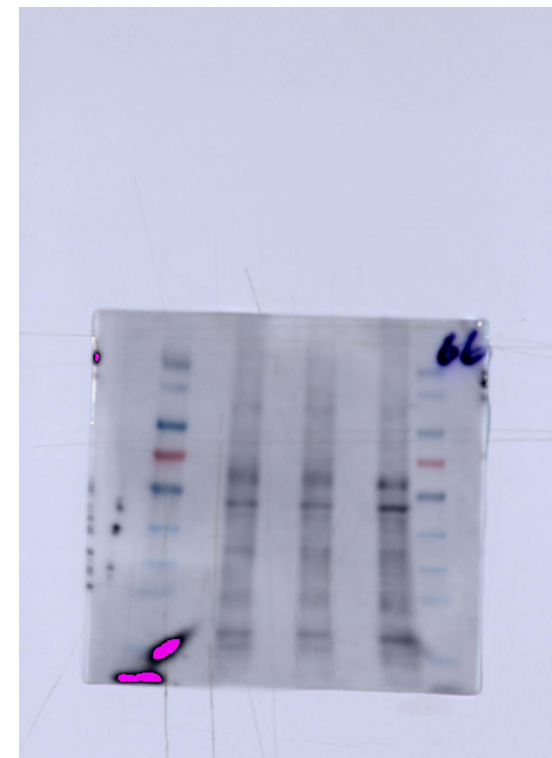

Figure S12D T cells co-cultured with ZJU0430

PD-1

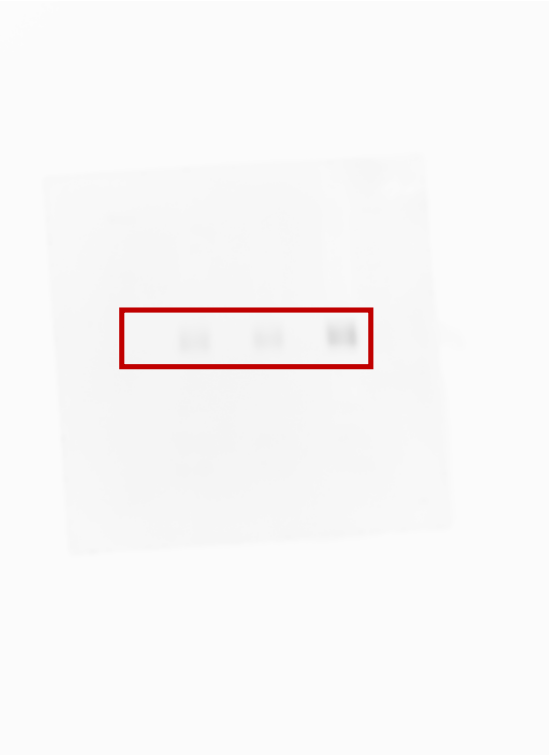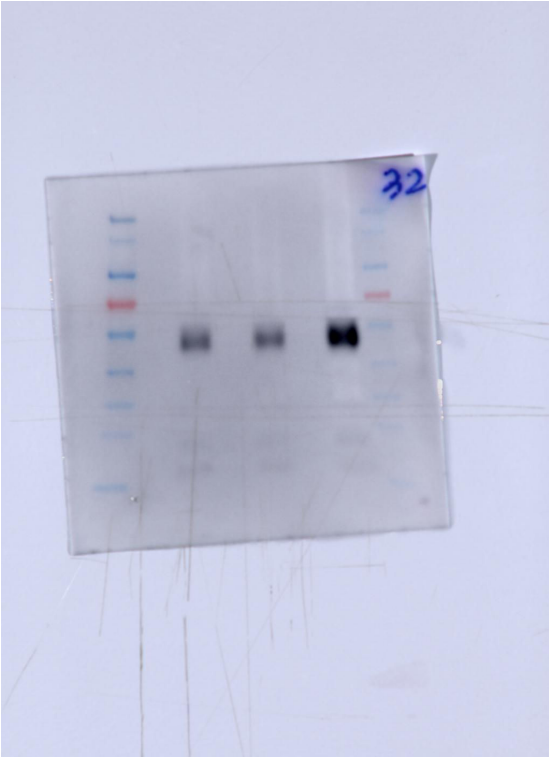

$\beta$  -Tubulin

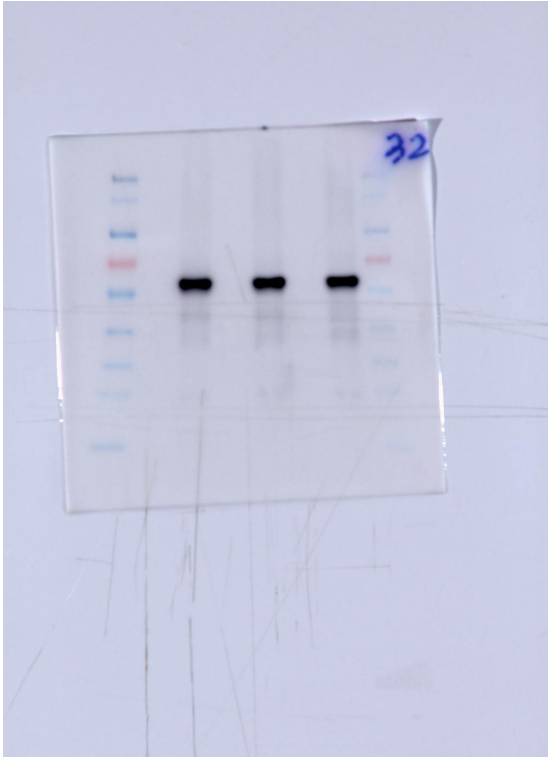

Figure S12D T cells co-cultured with ZJU0430

CTLA-4

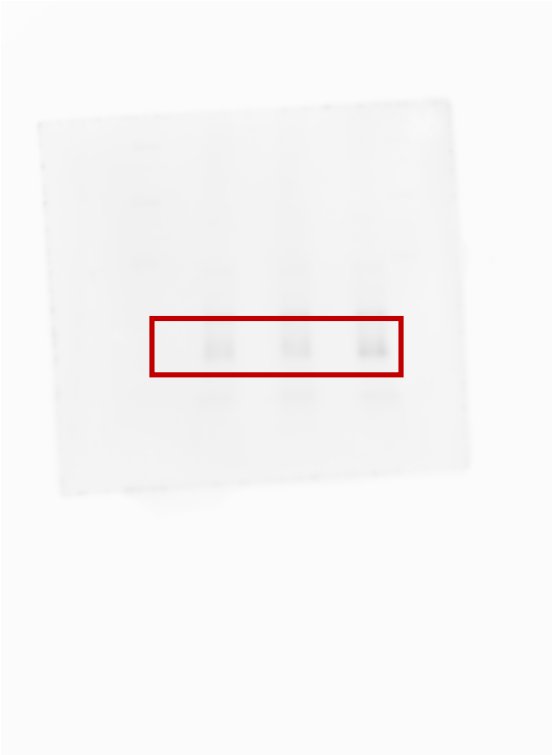

$\beta$ -Tubulin

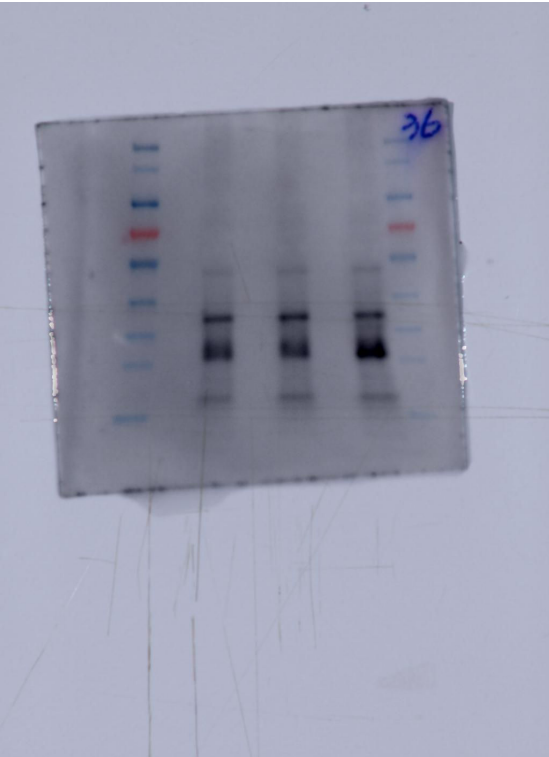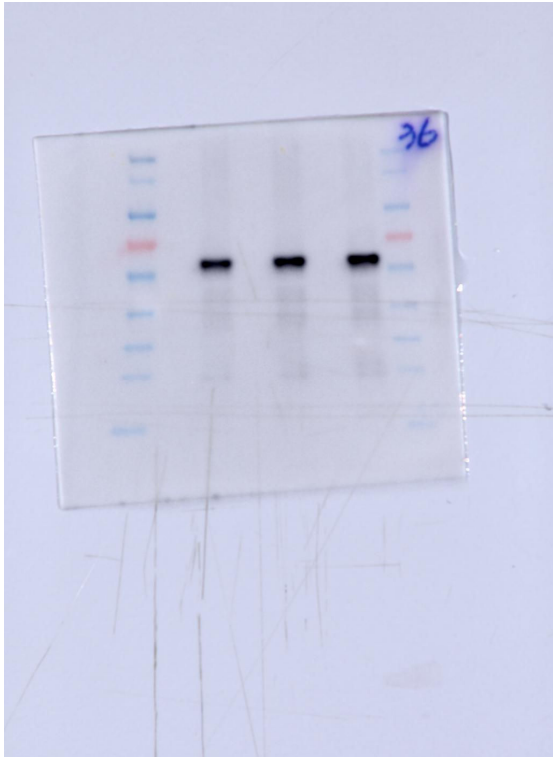

Figure S12D T cells co-cultured with ZJU0430

IFN- $\gamma$

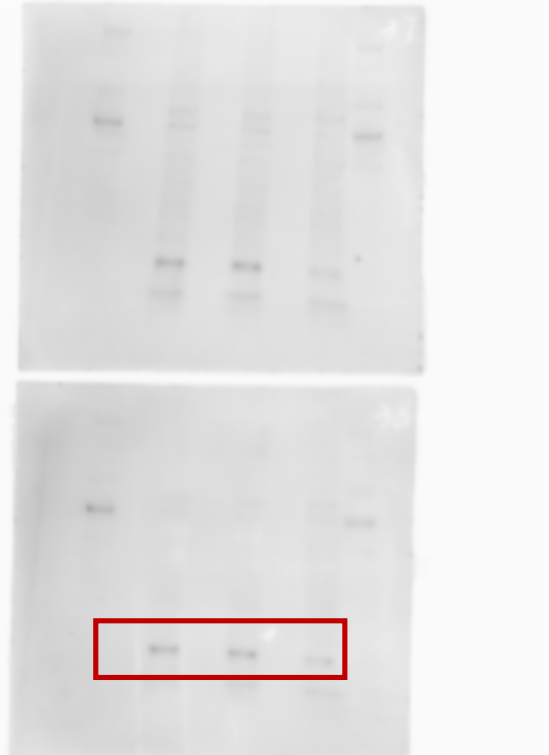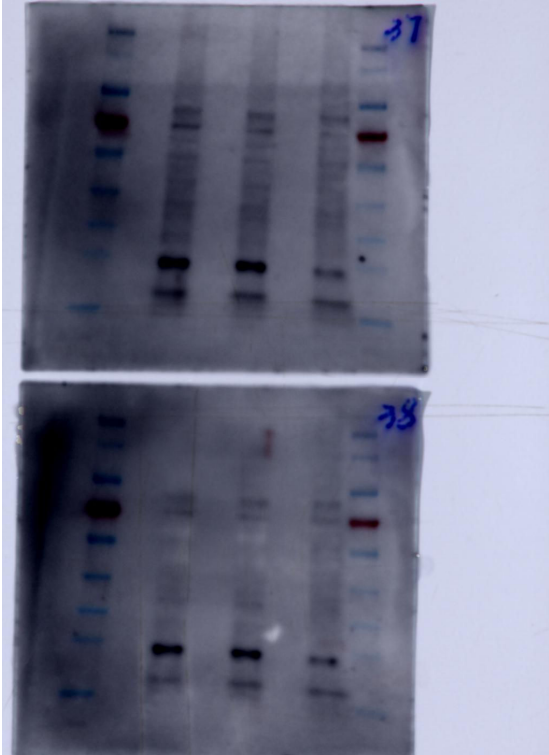

$\beta$  -Tubulin

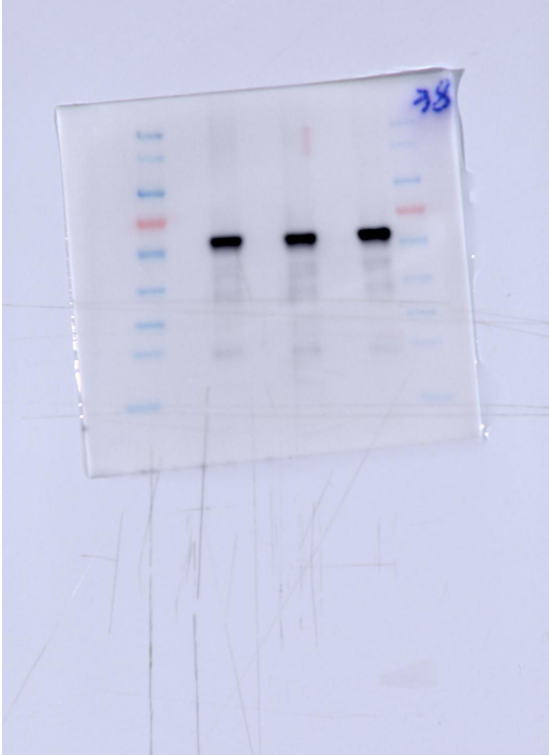

Figure S12D T cells co-cultured with ZJU0430

TNF- $\alpha$

$\beta$  -Tubulin

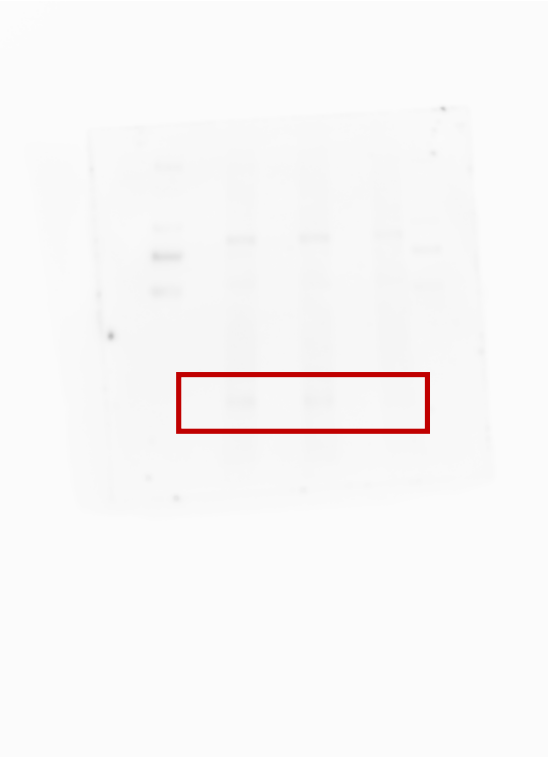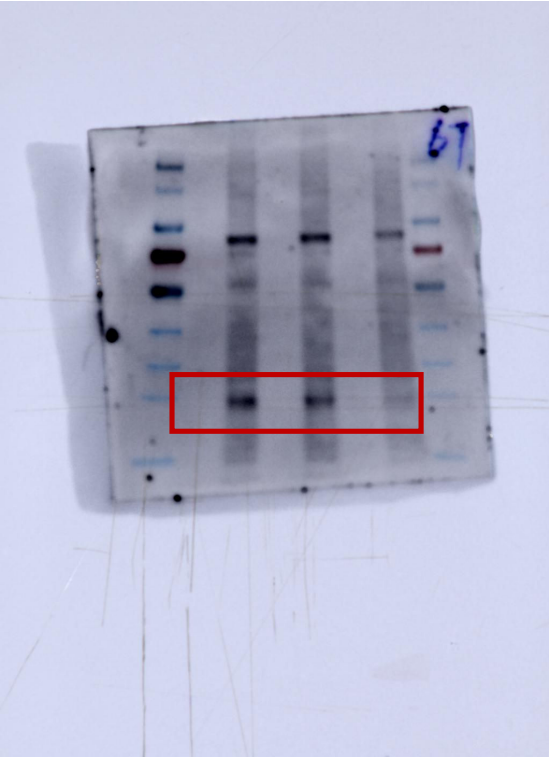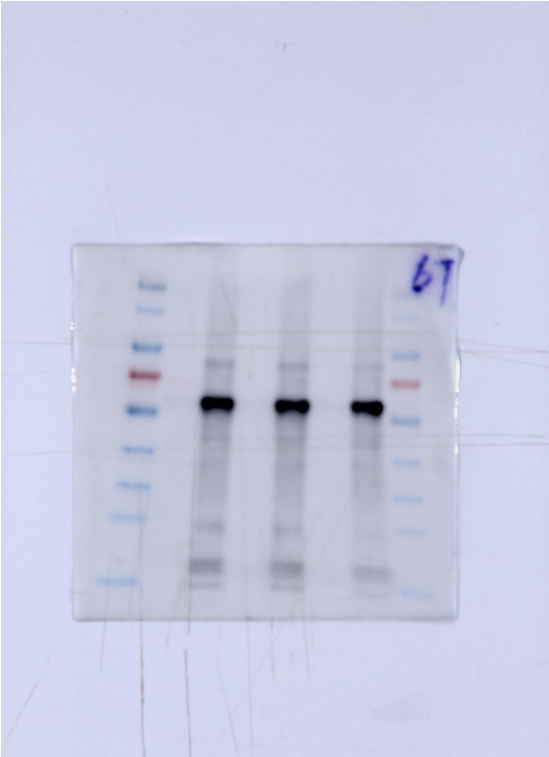

Figure S12E T cells co-cultured with GBC/SD

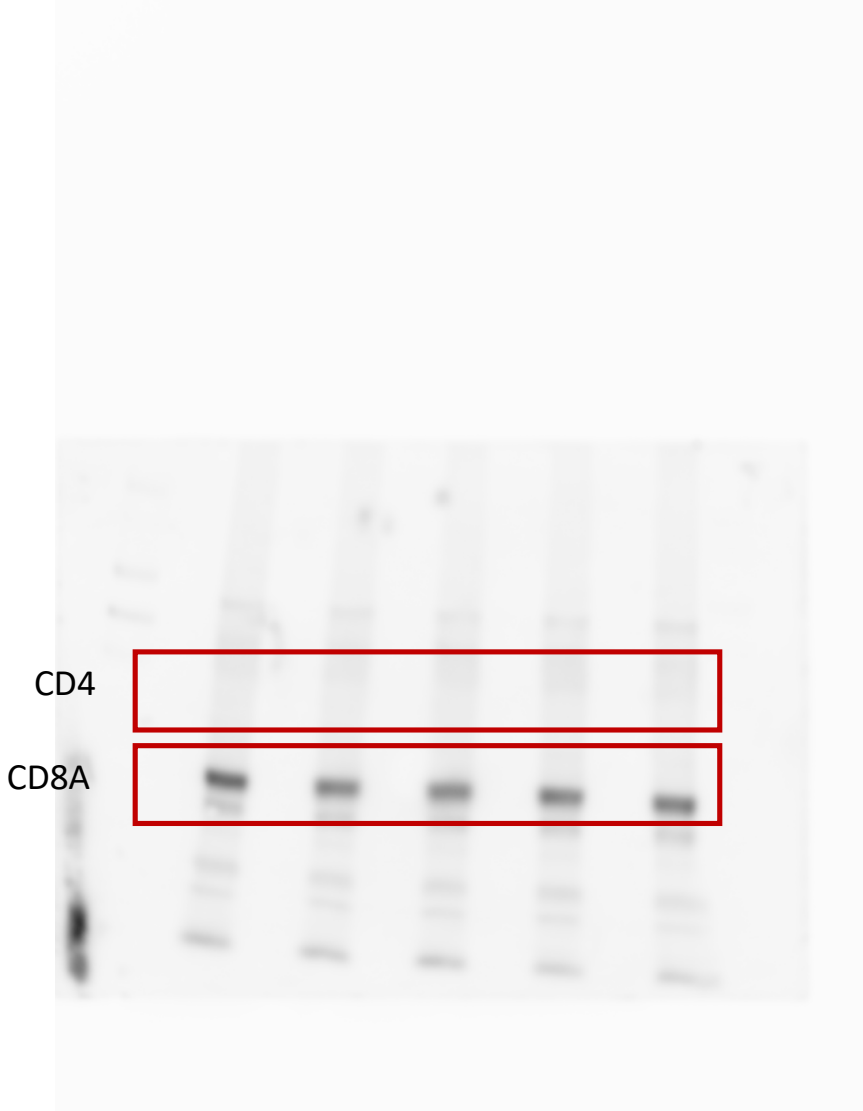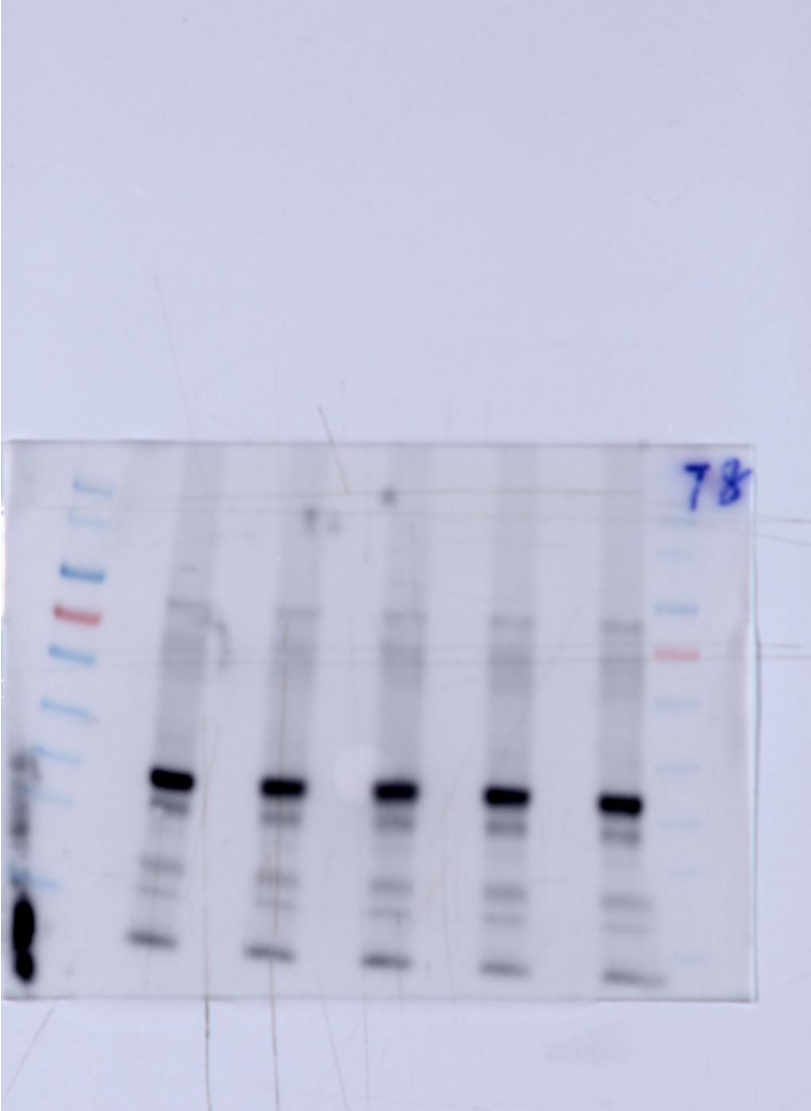

Figure S12E T cells co-cultured with GBC/SD

CXCL13

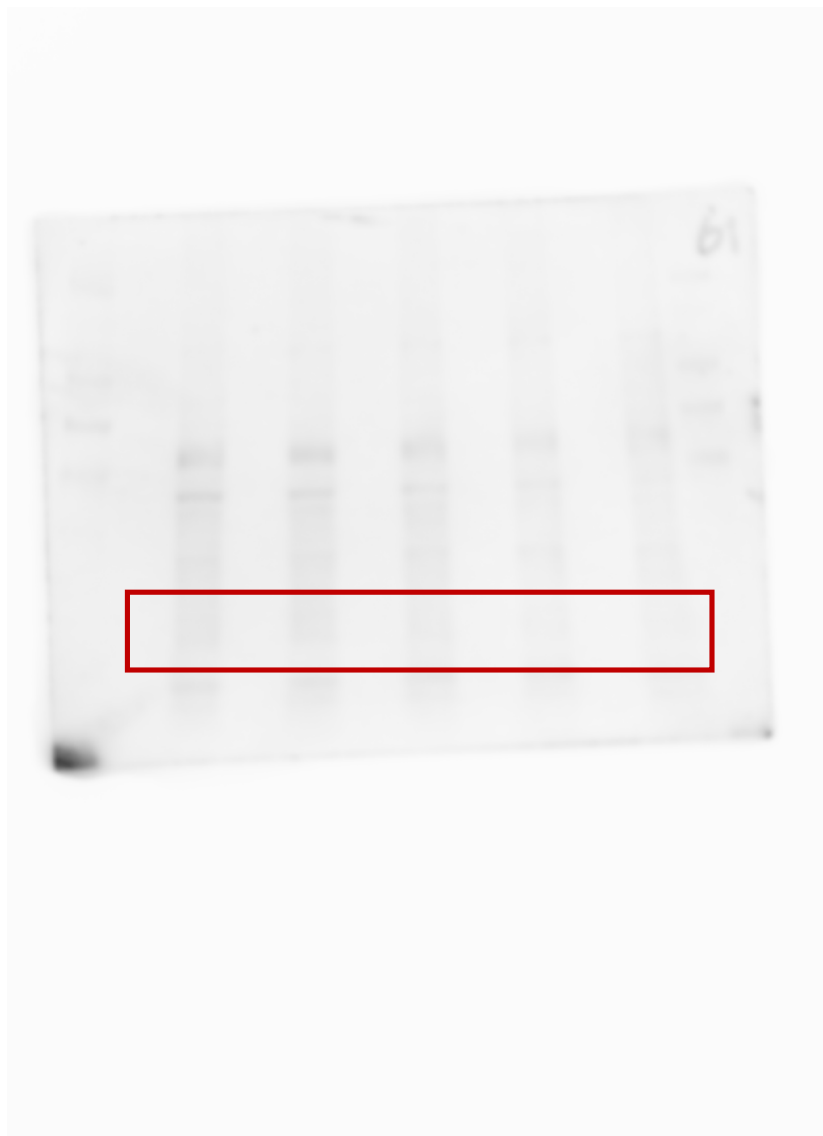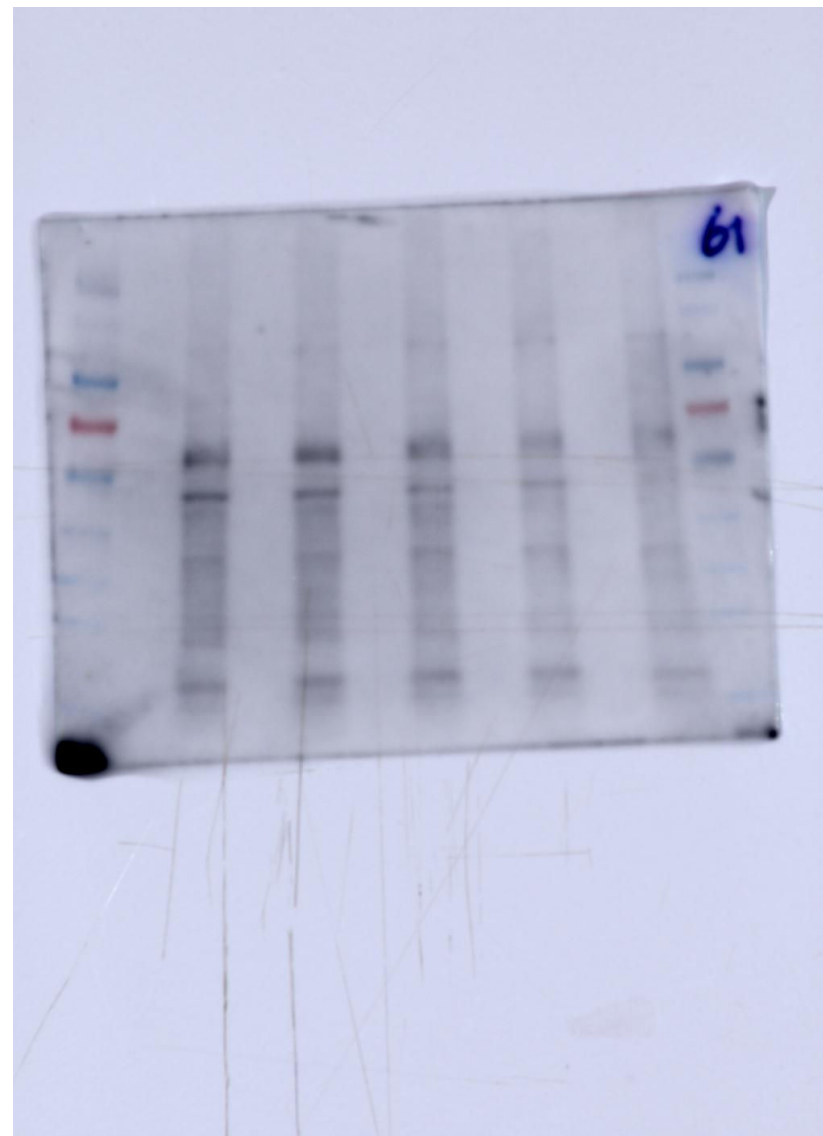

Figure S12E T cells co-cultured with GBC/SD

PD-1

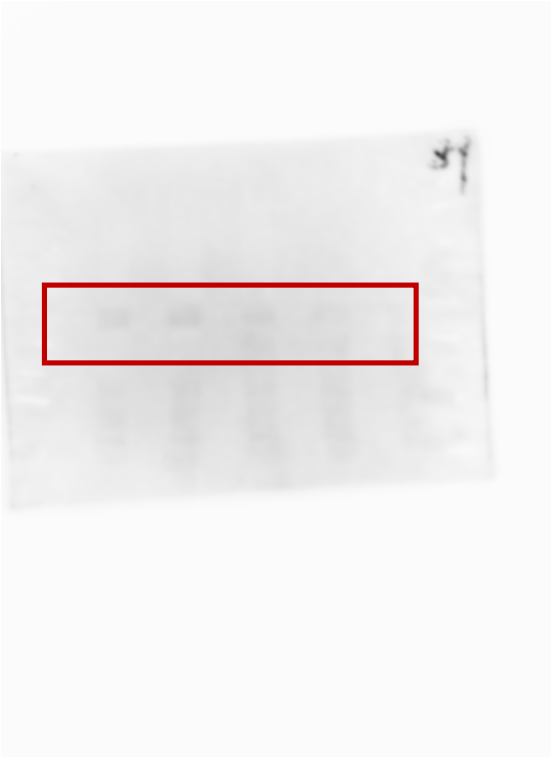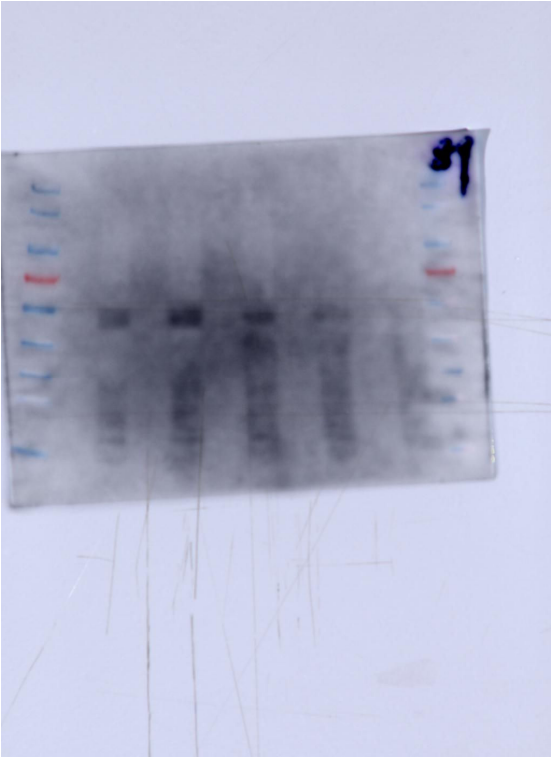

$\beta$ -Tubulin

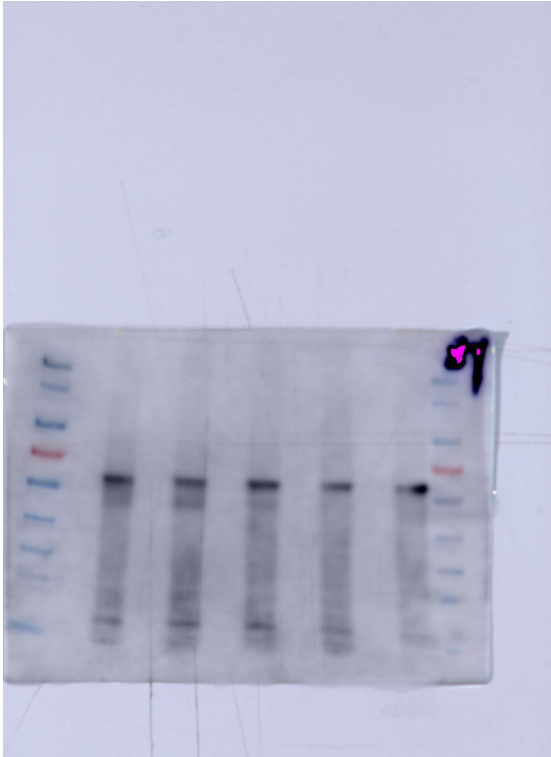

Figure S12E T cells co-cultured with GBC/SD

CTLA-4

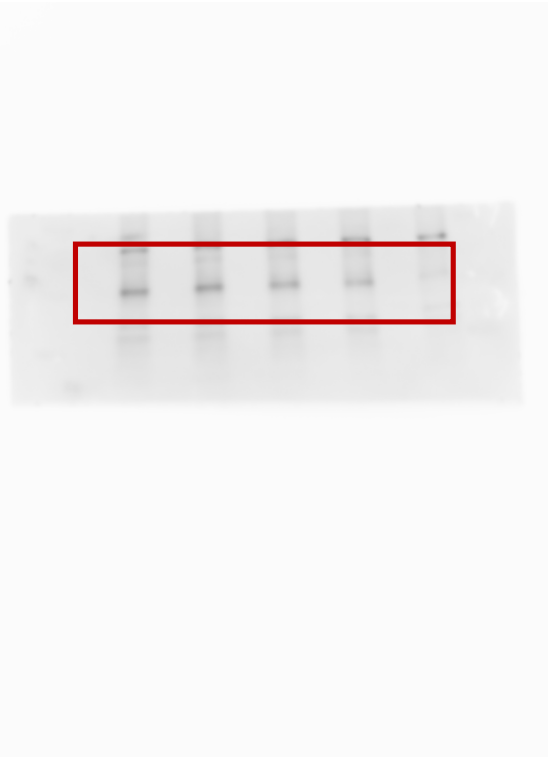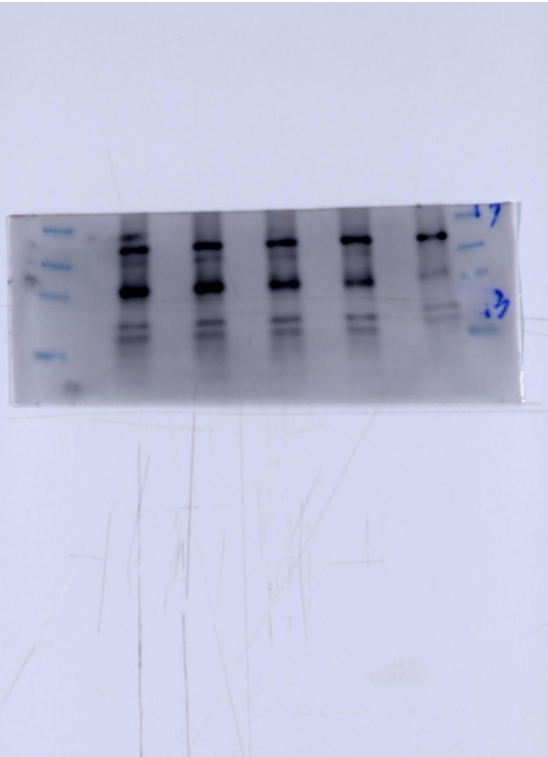

$\beta$ -Tubulin

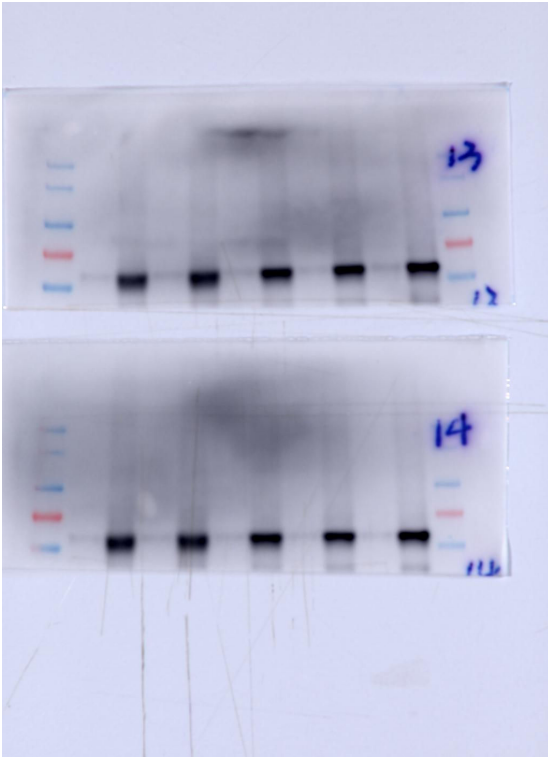

Figure S12E T cells co-cultured with GBC/SD

IFN- $\gamma$

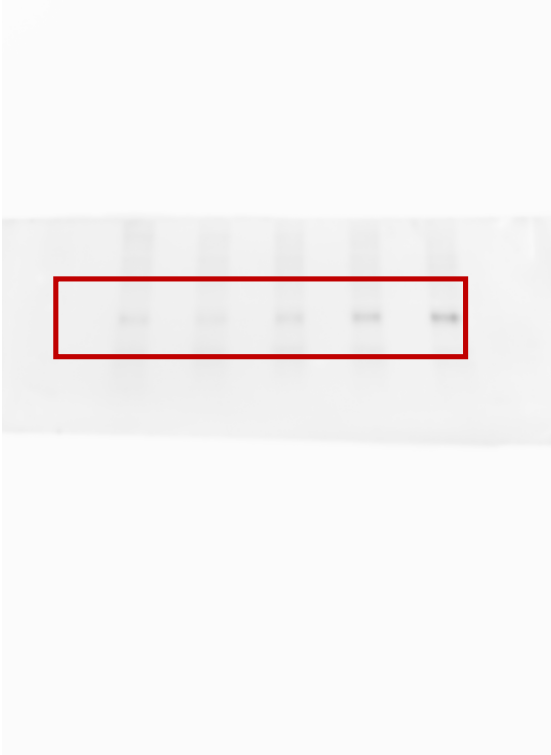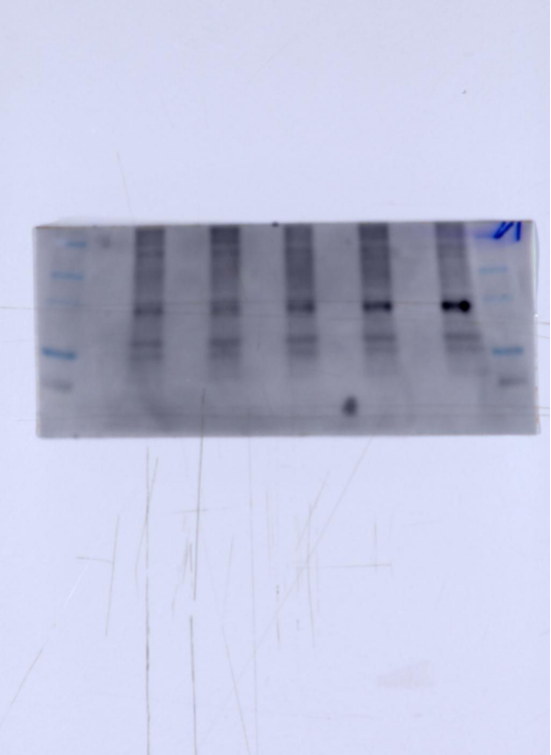

$\beta$ -Tubulin

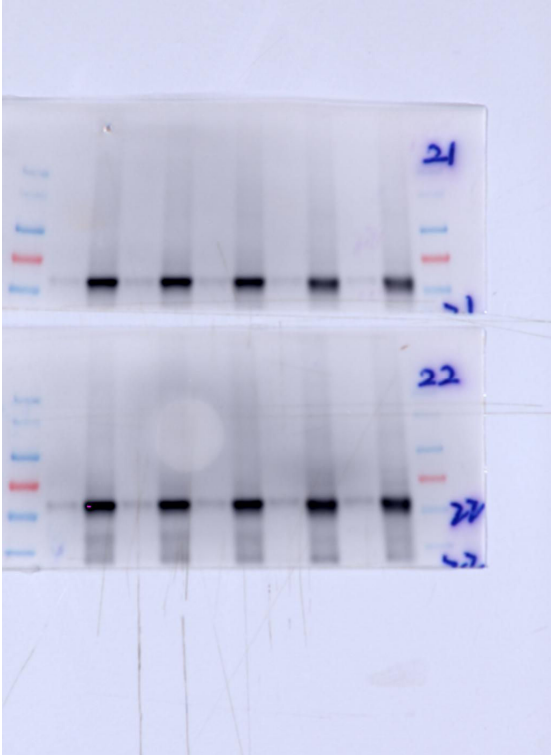

Figure S12E T cells co-cultured with GBC/SD

TNF- $\alpha$

$\beta$  -Tubulin

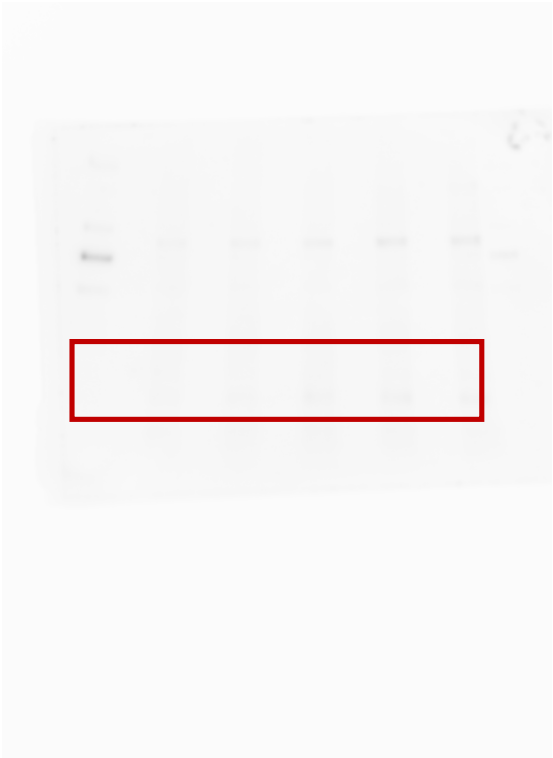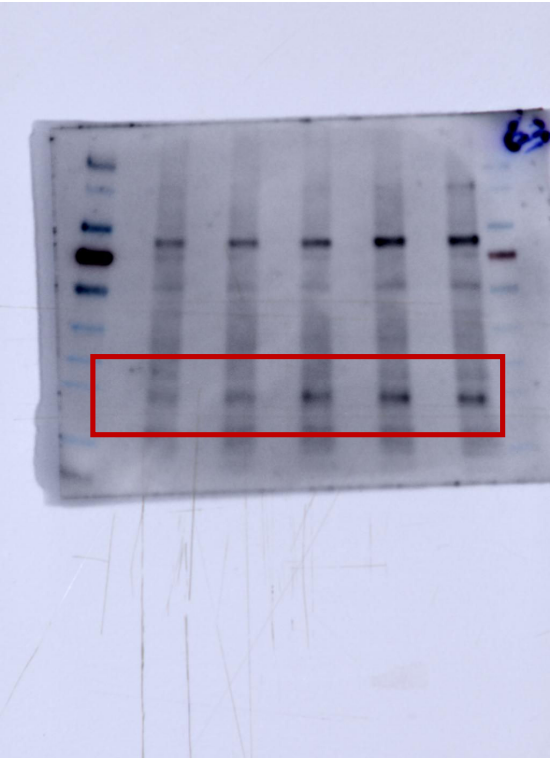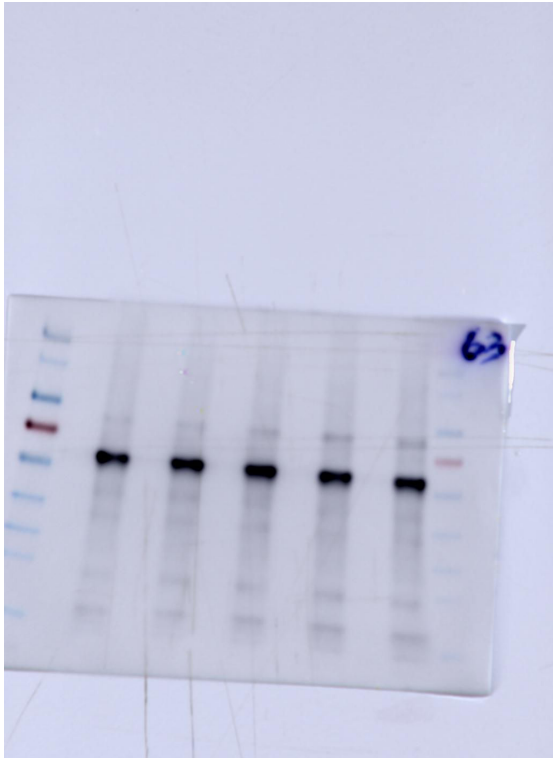

Figure S12E T cells co-cultured with ZJU0430

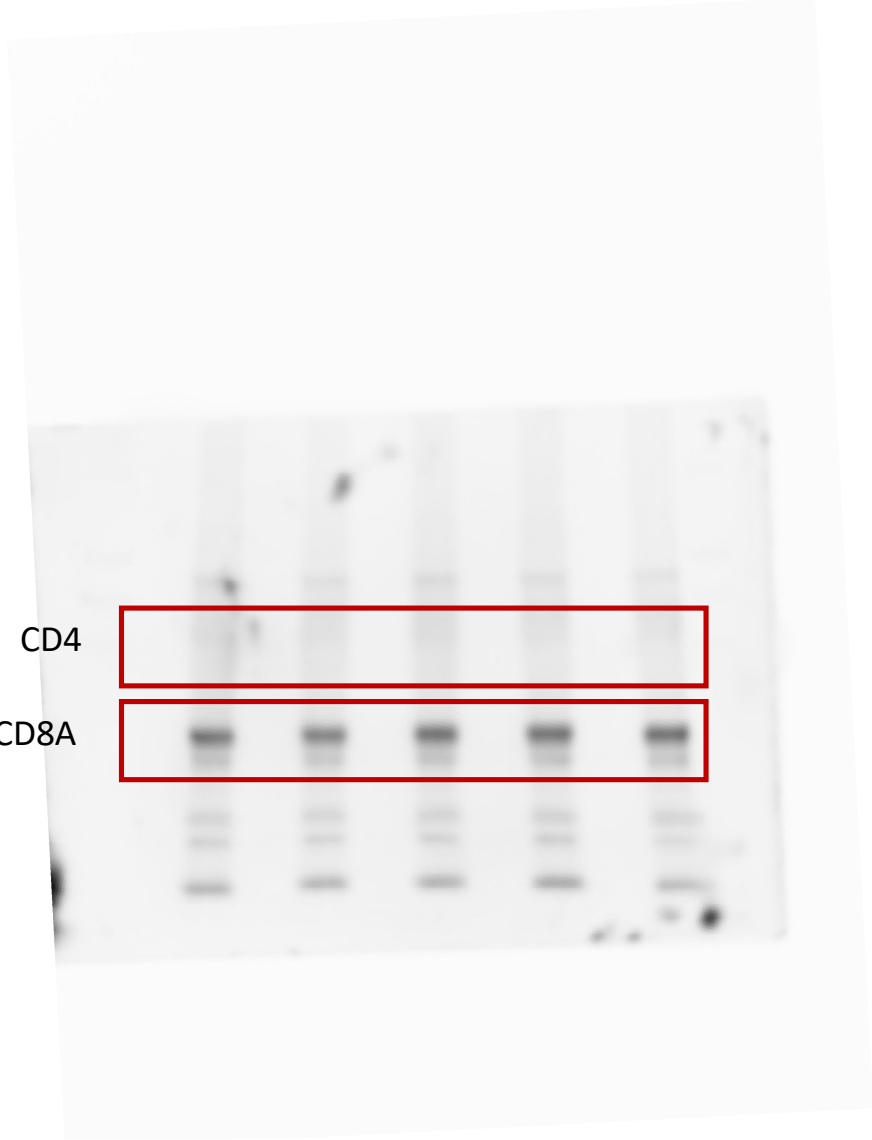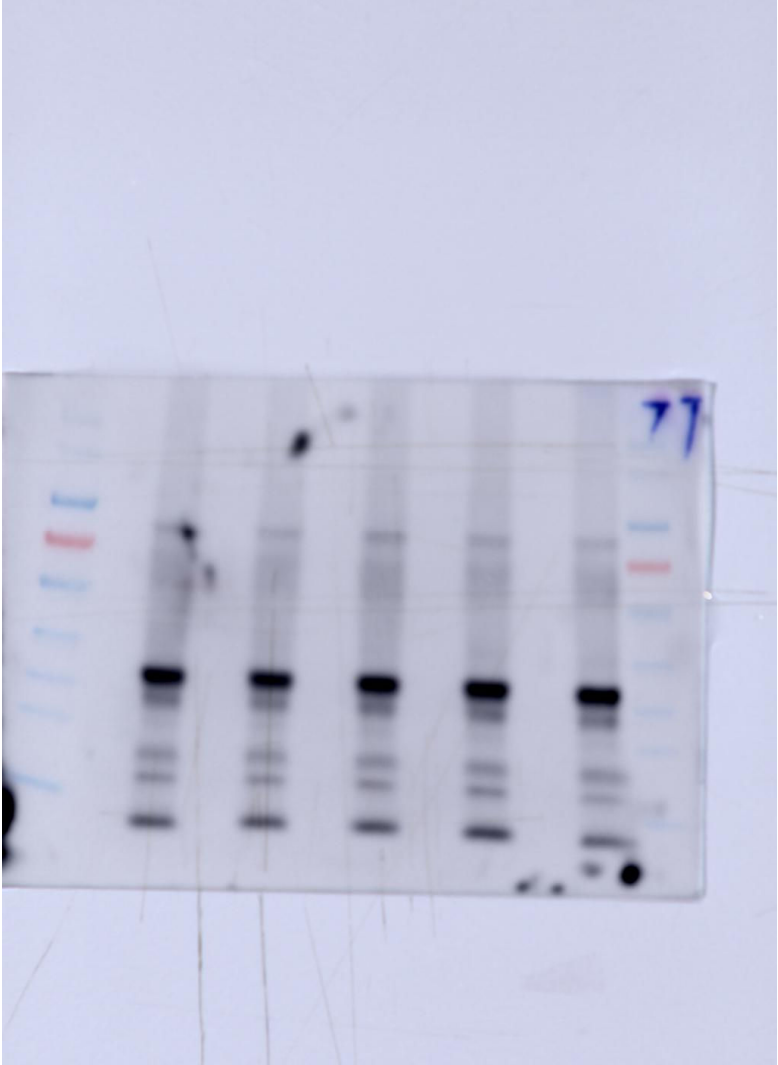

Figure S12E T cells co-cultured with ZJU0430

CXCL13

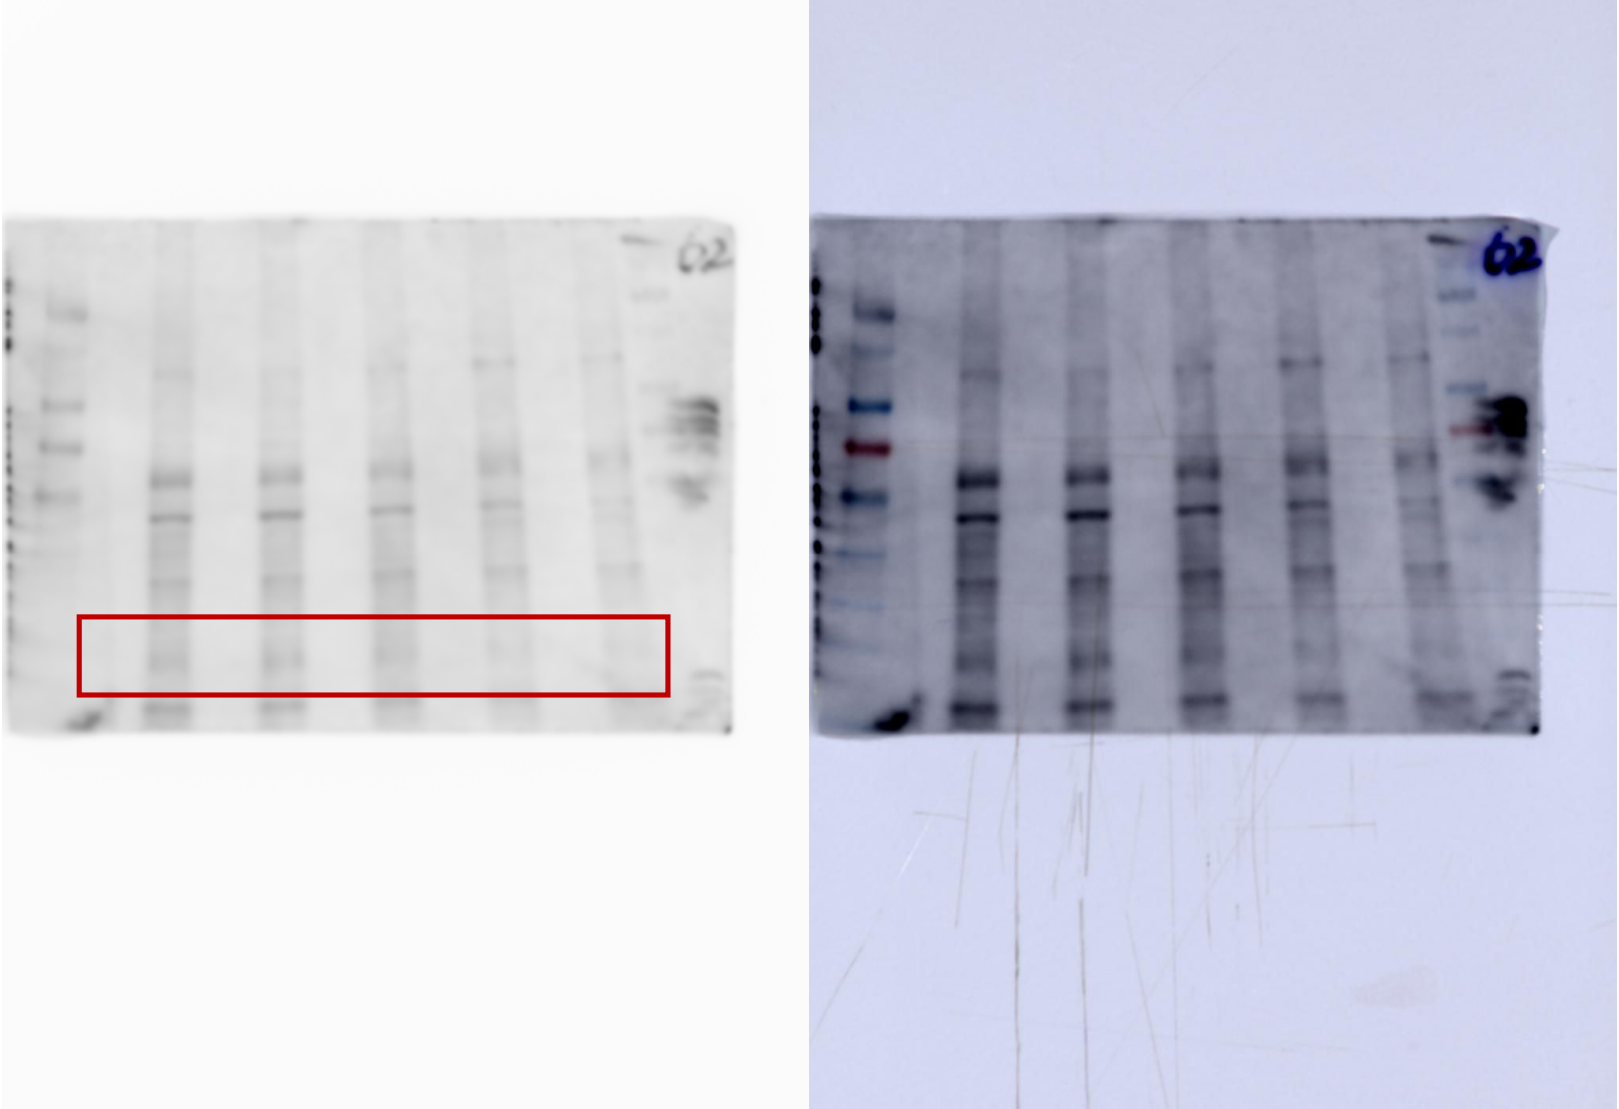

Figure S12E T cells co-cultured with ZJU0430

PD-1

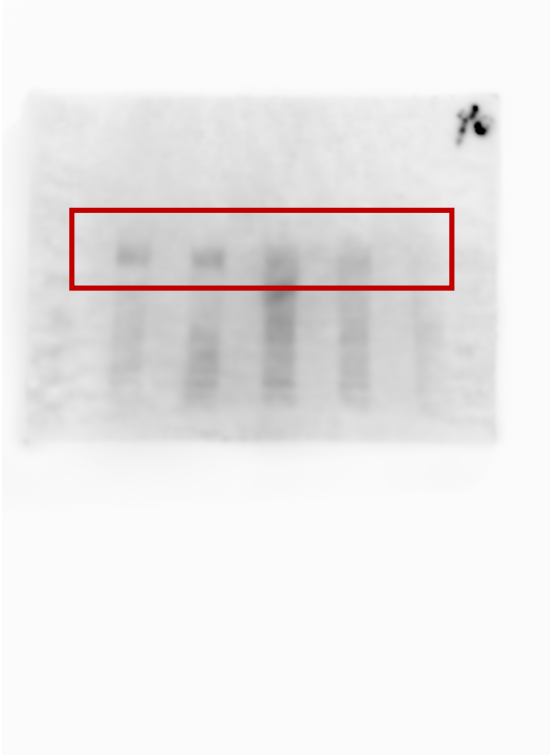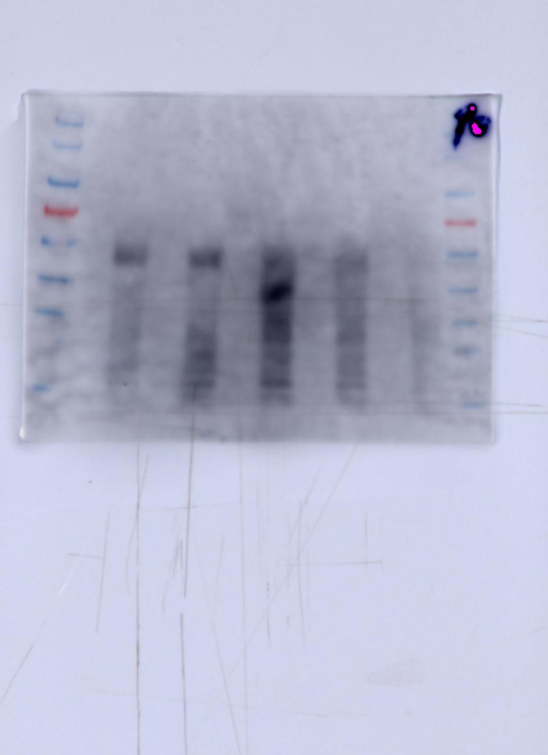

$\beta$  -Tubulin

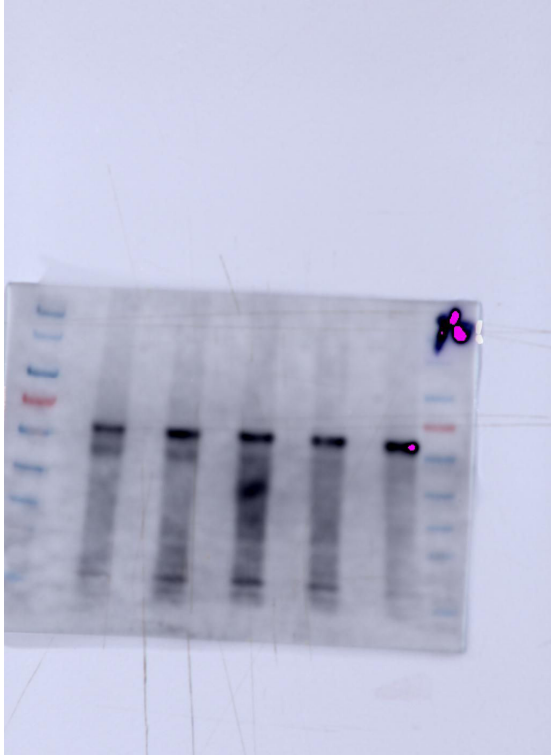

Figure S12E T cells co-cultured with ZJU0430

CTLA-4

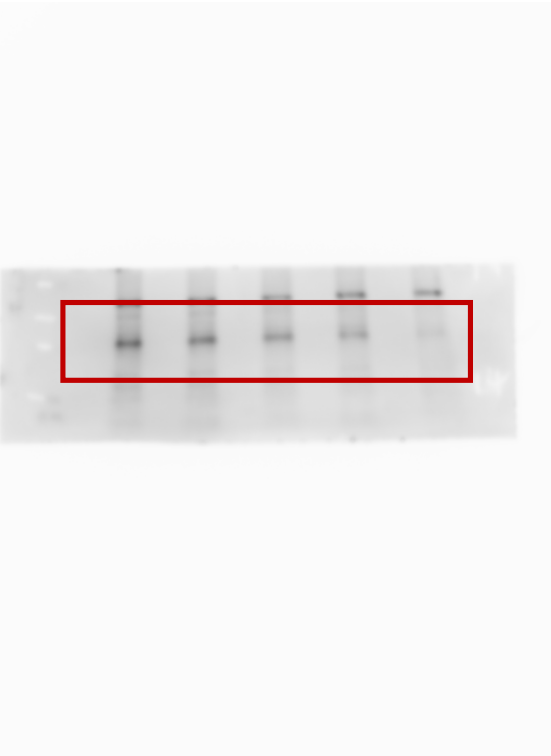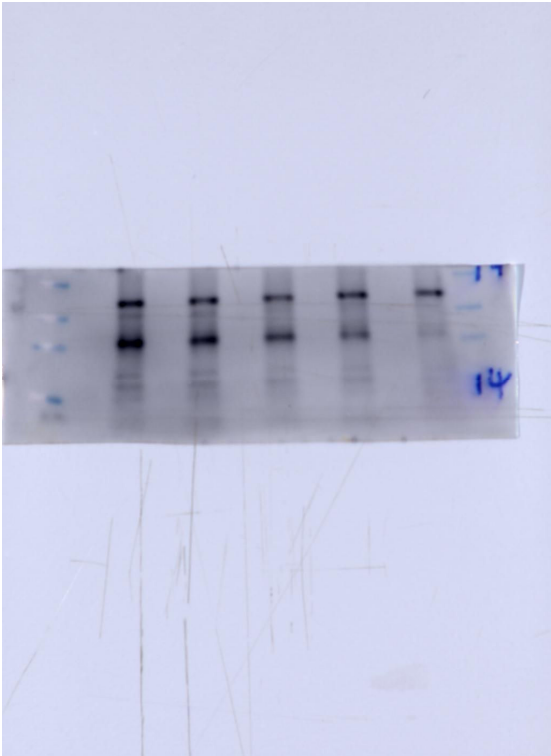

$\beta$ -Tubulin

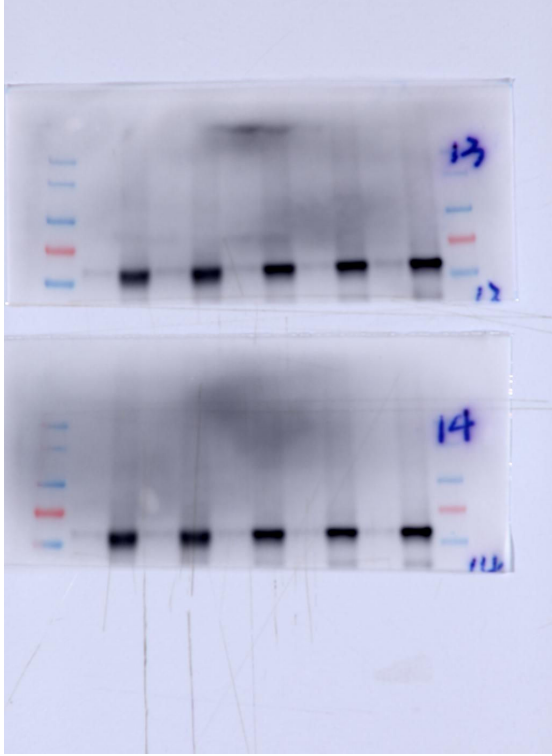

Figure S12E T cells co-cultured with ZJU0430

IFN- $\gamma$

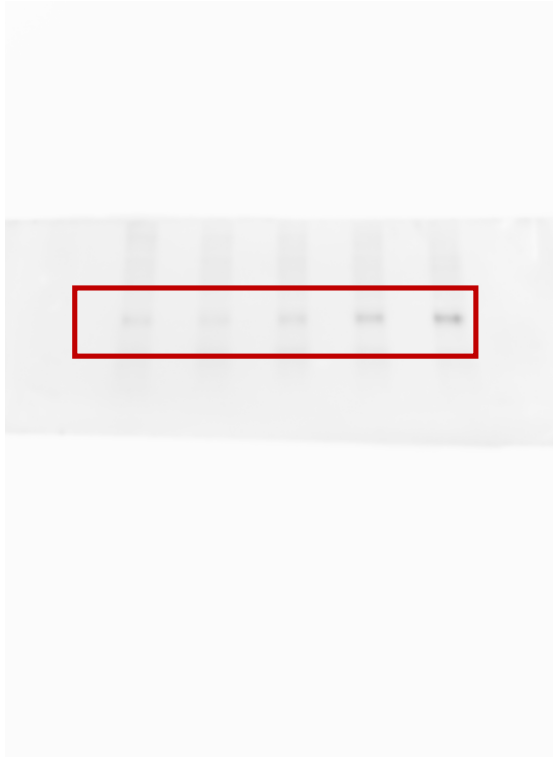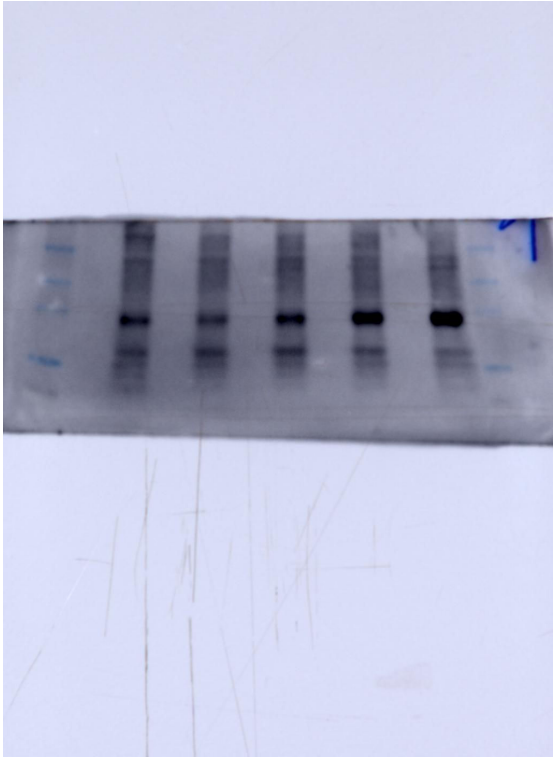

$\beta$ -Tubulin

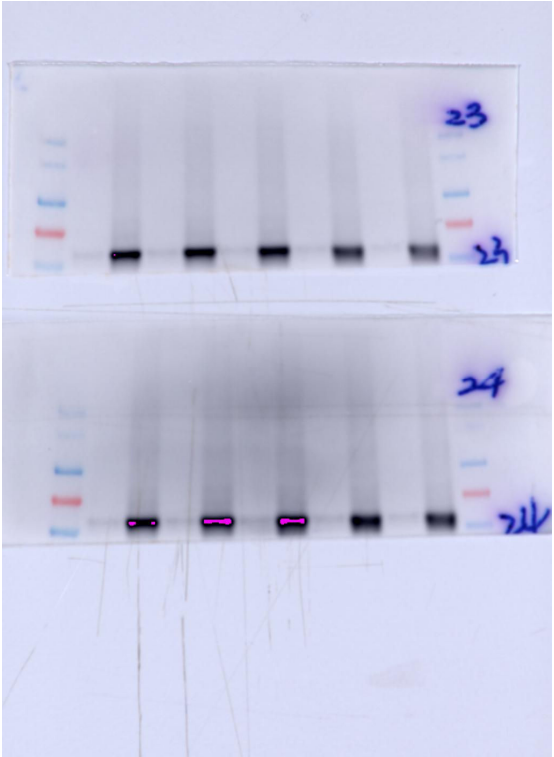

Figure S12E T cells co-cultured with ZJU0430

TNF- $\alpha$

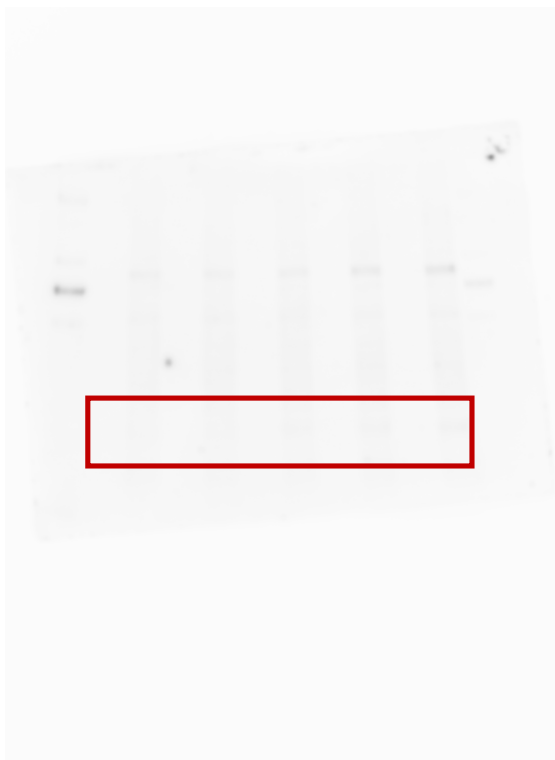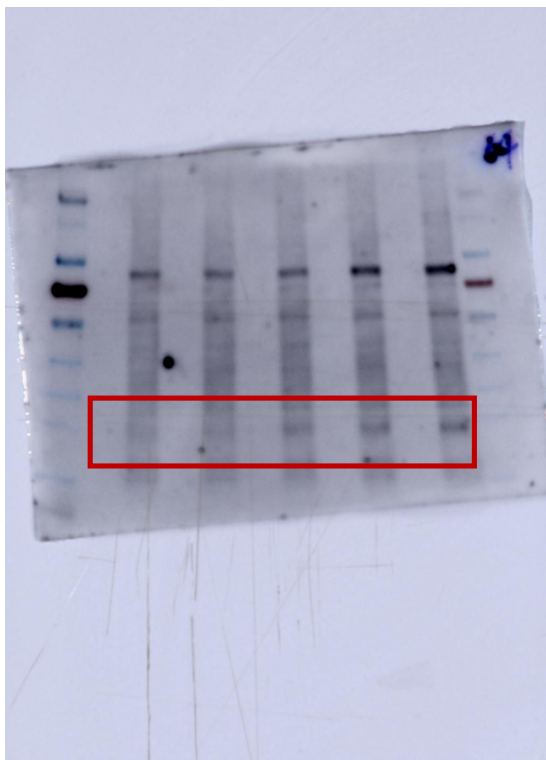

$\beta$ -Tubulin

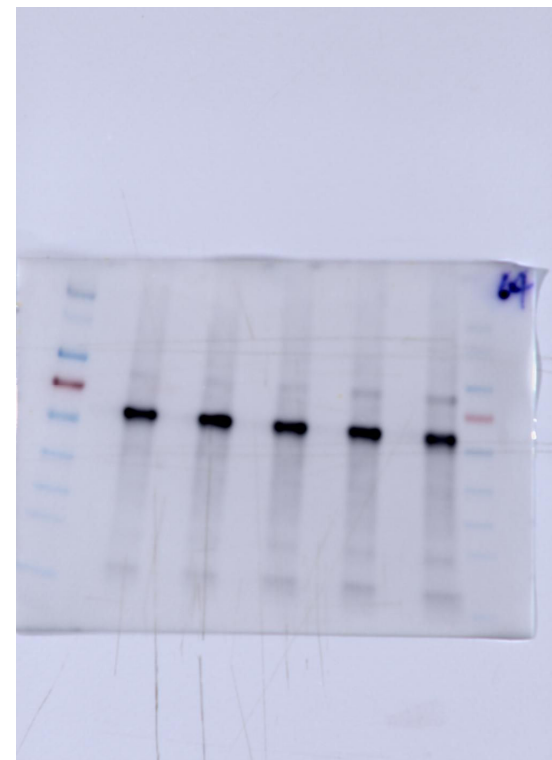

Supplement: sd2 [file 2]
